## 1 Differential use of multiple genetic sex determination systems in divergent ecomorphs of 2 an African crater lake cichlid

3 Hannah Munby<sup>1,†</sup>, Tyler Linderoth<sup>1,†,\*</sup>, Bettina Fischer<sup>1</sup>, Mingliu Du<sup>1,2,5</sup>, Grégoire Vernaz<sup>1,2,5</sup>, Alexandra M.  
4 Tyers<sup>3</sup>, Benjamin P. Ngatunga<sup>4</sup>, Asilatu Shechonge<sup>4</sup>, Hubert Denise<sup>1</sup>, Shane A. McCarthy<sup>1,5</sup>, Iliana  
5 Bista<sup>1,2,5</sup>, Eric A. Miska<sup>1,2,5</sup>, M. Emília Santos<sup>6</sup>, Martin J. Genner<sup>7</sup>, George F. Turner<sup>3</sup>, Richard Durbin<sup>1,5,\*</sup>

6 <sup>1</sup>Department of Genetics, University of Cambridge, Cambridge, UK

7 <sup>2</sup>Wellcome/CRUK Gurdon Institute, University of Cambridge, Cambridge, UK

8 <sup>3</sup>School of Natural Sciences, Bangor University, Bangor, UK

9 <sup>4</sup>Tanzania Fisheries Research Institute, Dar es Salaam, Tanzania

10 <sup>5</sup>Wellcome Sanger Institute, Hinxton, Cambridge, UK

11 <sup>6</sup>Department of Zoology, University of Cambridge, Cambridge, UK

12 <sup>7</sup>School of Biological Sciences, University of Bristol, Bristol, UK

13 †Authors contributed equally to the work.

14 \*Authors for correspondence: [tl483@cam.ac.uk](mailto:tl483@cam.ac.uk), [rd109@cam.ac.uk](mailto:rd109@cam.ac.uk)

## 15 Abstract

16 African cichlid fishes not only exhibit remarkably high rates of speciation but also have some of  
17 the fastest evolving sex determination systems in vertebrates. However, little is known  
18 empirically in cichlids about the genetic mechanisms generating new sex-determining variants,  
19 what forces dictate their fate, the demographic scales at which they evolve, and whether they  
20 are related to speciation. To address these questions, we looked for sex-associated loci in full  
21 genome data from 647 individuals of *Astatotilapia calliptera* from Lake Masoko, a small isolated  
22 crater lake in Tanzania, which contains two distinct ecomorphs of the species. We identified  
23 three separate XY systems on recombining chromosomes. Two Y alleles derive from mutations  
24 that increase expression of the gonadal soma-derived factor gene (*gsdf*) on chromosome 7; the  
25 first is a tandem duplication of the entire gene observed throughout much of the Lake Malawi  
26 haplochromine cichlid radiation to which *A. calliptera* belongs, and the second is a 5 kb insertion  
27 directly upstream of *gsdf*. Both the latter variant and another 700 bp insertion on chromosome  
28 19 responsible for the third Y allele arose from transposable element insertions. Males  
29 belonging to the Masoko deep-water benthic ecomorph are determined exclusively by the *gsdf*

30 duplication, whereas all three Y alleles are used in the Masoko littoral ecomorph, in which they  
31 appear to act antagonistically among males with different amounts of benthic admixture. This  
32 antagonism in the face of ongoing admixture may be important for sustaining multifactorial sex  
33 determination in Lake Masoko. In addition to identifying the molecular basis of three coexisting  
34 sex determining alleles, these results demonstrate that genetic interactions between Y alleles  
35 and genetic background can potentially affect fitness and adaptive evolution.

## 36 **Introduction**

37 Sex, as a means of generating beneficial combinations of alleles, is one of the most effective  
38 evolutionary innovations used among eukaryotes to surmount fitness challenges. Many different  
39 means of establishing separate sexes have arisen across the tree of life, operating through a  
40 combination of genetic and environmental mechanisms (Bachtrog *et al.*, 2014; Pennell *et al.*,  
41 2018). The continued evolution of new sex determination systems can provide a means to  
42 improve fitness via altering sex ratios (Kocher, 2004), resolving sexually antagonistic mutations  
43 (van Doorn & Kirkpatrick, 2007; 2010), and avoiding the negative consequences of sex  
44 chromosome degeneration (Blaser *et al.*, 2013). Given this adaptive role of sex determination,  
45 this begs the question of whether it is any coincidence that the fastest reported rates of sex  
46 chromosome and heterogamety transitions among vertebrates (El Taher *et al.*, 2020) have  
47 occurred in East African cichlid fishes, renowned also for their extremely high speciation rates  
48 (Brawand *et al.*, 2014; Ronco *et al.*, 2020). In support of such an association, population genetic  
49 models have demonstrated how heterogamety switches arising from a new sex-determining  
50 locus coupled with sexual and sex-ratio selection can help generate reproductive isolation in  
51 sympatry (Lande *et al.*, 2001).

52 Sex-determination across African cichlid species is largely governed genetically in either a  
53 single-locus or polygenic fashion (Ser *et al.*, 2010). The loci controlling sex are known to exist  
54 both on homomorphic sex chromosomes, for which there is little if any evidence for long range  
55 suppression of recombination around the sex-determining alleles (Parnell & Streelman, 2013),  
56 and on supernumerary B chromosomes (Clark *et al.*, 2017; Clark & Kocher, 2019). Within the  
57 Lake Malawi haplochromine cichlid radiation, the characterized sex determining loci are the  
58 orange blotch associated ZW locus and an XY locus on chr5 (Roberts *et al.*, 2009; Ser *et al.*,  
59 2010), two XY loci on chr7 (Albertson, 2002; Parnell & Streelman, 2013; Roberts *et al.*, 2009),  
60 an XY locus on chr3, and a ZW locus on chr20 (Parnell & Streelman, 2013), using the

61 chromosome numbering established for the *Metriaclima zebra* genome (Conte & Kocher, 2015).  
62 In most of these cases, multiple sex determination systems have been observed to act within a  
63 single species. Most studies to date have identified sex-associated loci through  
64 captive-breeding experiments (e.g. Parnell & Streebman, 2013; Ser *et al.*, 2010), which provide  
65 only broad genomic resolution, or through GWAS on relatively small sample sizes in wild  
66 populations with limited power to detect intraspecific associations (El Taher *et al.*, 2020). While  
67 these studies point to cichlid sex determination as being highly fluid on the timescale of  
68 hundreds of thousands to millions of years, studies on the dynamics within populations would  
69 provide the context for examining how recombination, selection, and drift interact with molecular  
70 mechanisms to shape the evolution of nascent sex chromosomes (Furman *et al.*, 2020). To this  
71 end, we sought to understand how sex determination acts in a single population of the eastern  
72 happy cichlid *Astatotilapia calliptera*.

73 *Astatotilapia calliptera* is found both in the shallow margins of Lake Malawi as well as in the  
74 surrounding rivers and smaller lakes. Peterson *et al.* (2017) found that the major chr7 XY locus  
75 previously identified in Malawi Mbuna cichlids determined sex in a population of *A. calliptera*  
76 from Lake Malawi. Despite only mapping the effect to megabase-scale resolution, they  
77 postulated that a variant in the gonadal soma-derived factor (*gsdf*) gene on chromosome 7 was  
78 responsible for dictating sex given its repeated role in sex determination in other fish species  
79 (Einfeldt *et al.*, 2021; Jiang *et al.*, 2016; Kaneko *et al.*, 2015; Myosho *et al.*, 2012).

80 In particular, we studied *A. calliptera* in crater Lake Masoko to the north of Lake Malawi, which is  
81 estimated to have formed ~50,000 years ago (Williamson *et al.*, 1999). Lake Masoko is only 700  
82 metres in diameter with a shallow littoral margin and walls steeply descending to around 36 m at  
83 its deepest point (Turner *et al.*, 2019). It is currently a closed system, without surface  
84 connections to any other water bodies (Turner *et al.*, 2019). With the only other fish being two  
85 cichlid species distantly related to *A. calliptera* and one clariid catfish species, the lake provides  
86 a relatively simple context for studying the evolutionary genetics of sex determination,  
87 speciation and their potential interaction. Genomic evidence suggests that *A. calliptera*  
88 colonised the shallow littoral habitat from nearby river systems ~10,000 years ago, and  
89 subsequently extended its range into the deeper benthic habitat ~1,000 years ago (Malinsky *et al.*  
90 *et al.*, 2015). These shallow littoral and deep benthic populations are phenotypically distinct  
91 ecomorphs, with the differences in habitat use coinciding with differences in body shape and jaw  
92 morphology. Moreover, the ecomorphs can be distinguished by differences in male breeding

93 colouration, with reproductively active littoral males being typically yellow, and benthic males  
94 dark blue. Both ecomorphs are sexually dimorphic, with males generally larger and more  
95 brightly coloured than the females, which tend to have a duller, silvery brown colouration.

## 96 **Results**

97 We collected whole genome shotgun sequencing data for 548 *Astatotilapia calliptera* from Lake  
98 Masoko at a median coverage of 14.5x (range 4.5x - 22x, mean of 12.2x), and combined this  
99 with data from 99 previously published samples (Malinsky *et al.*, 2015), resulting in whole  
100 genome sequence data for 596 male and 51 female fish (Supplementary Table 1). Reads were  
101 mapped to the high-quality fAstCal1.2 *A. calliptera* reference genome and variants called at  
102 3,328,052 quality-screened single nucleotide polymorphism (SNP) sites (see Methods for  
103 details).

### 104 *Multiple Y alleles determine sex in Lake Masoko*

105 We carried out a genome wide association study (GWAS) for sex using a linear mixed model  
106 framework (Figure 1a). The most strongly associated SNP is very highly significant ( $\log_{10}$   
107 p-value = 2.02e-22), and located at position 18,098,212 on chromosome 7 approximately 8 kb  
108 downstream of the gene *gsdf*. By considering read depth summed over all fish heterozygous for  
109 this SNP, we established that it, and the entire *gsdf* gene, are contained in a 20 kb-long region  
110 that exhibits 50% inflated relative coverage in the heterozygotes, suggesting that the associated  
111 variant chromosome contains a duplication of this region (Figure 1b). We examined paired end  
112 Illumina reads from Masoko *A. calliptera* samples homozygous for the apparent duplication  
113 (Supplementary Figure 1a), and long Pacific Biosciences reads from a male fish from a related  
114 species (*Tropheops* sp. 'mauve') which also shows the inflated coverage pattern  
115 (Supplementary Figure 1b), and in both cases confirmed the presence of a tandem duplication  
116 spanning coordinates 18,079,155 to 18,100,834 of chr7. We also confirmed the presence of this  
117 duplication junction by PCR (Supplementary Figure 1c). Copy number of the duplication is a  
118 stronger predictor of sex than the best associated SNP from the GWAS scan (Table 1),  
119 suggesting that the duplication itself operates as a Y allele in an XY sex determination system.

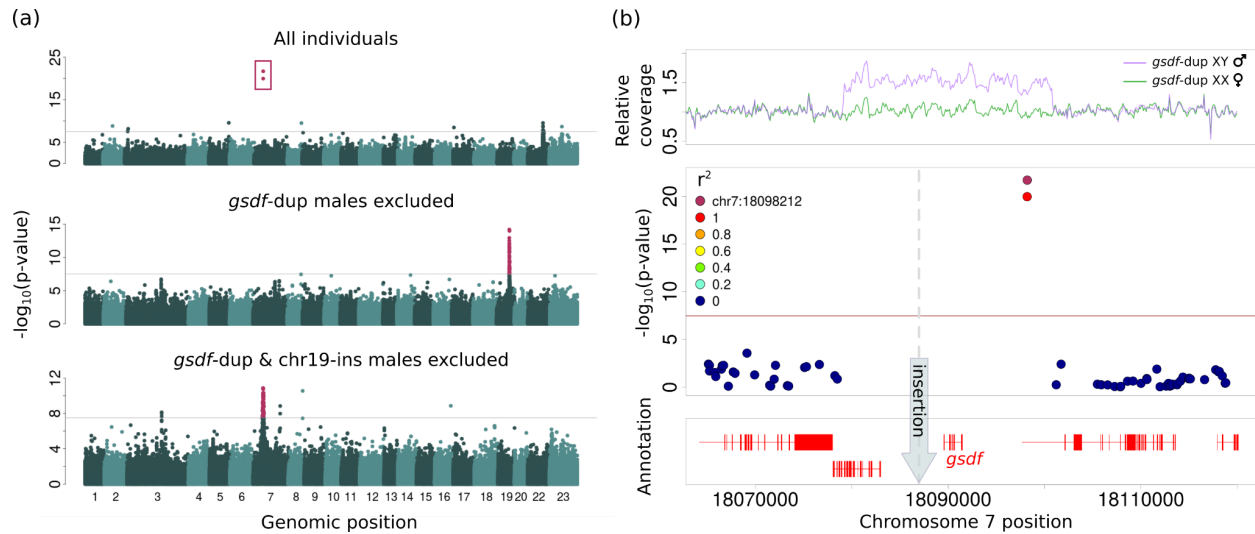

120 **Figure 1: Genome-wide association study for sex.** (a) P-values for the likelihood ratio test of  
 121 an association between sex of *Astatotilapia calliptera* from Lake Masoko and their posterior  
 122 mean genotypes at SNPs across the genome. The panels in order from top to bottom show  
 123 results from the serial GWAS in which we looked for sex associations using all females and a  
 124 subset of males not possessing the alternate allele of the single most highly-ranked SNP (or  
 125 *g sdf*-dup specifically for iterations two and three) from any of the previous GWAS. The grey,  
 126 horizontal line in each of the Manhattan plots indicates the 0.05 Bonferroni-adjusted significance  
 127 threshold, correcting for the number of tested SNPs. Significant SNPs tagging sex-determining  
 128 loci are shown in maroon. (b) A zoomed-in view of the region harboring the SNPs most strongly  
 129 associated with sex on chromosome 7. SNPs are coloured based on their degree of linkage  
 130 disequilibrium with the most strongly sex-associated SNP tagging the *g sdf* duplication. The top  
 131 panel shows the average sequencing depth in 100 bp bins of males heterozygous for the *g sdf*  
 132 duplication compared to females. The sequencing depth of each individual was normalized with  
 133 respect to their average depth in the non-duplicated flanking regions such that an increase of  
 134 0.5x in males compared to females indicates the presence of an extra copy of this locus. The  
 135 duplication spans the region containing the entire *g sdf* gene and SNPs just downstream of *g sdf*  
 136 were highly associated with sex in the GWAS run on all males and females. A 5 kb insertion  
 137 upstream of *g sdf* indicated by the grey arrow characterizes the chr7-ins Y allele, which was in  
 138 high linkage with the strongly sex-associated chromosome 7 SNPs in the bottom panel of (a).

139 **Table 1: Frequency of sex-determining genotypes in Lake Masoko *Astatotilapia calliptera***  
 140 Multilocus genotypes for the sex determining loci are based on the number *g sdf* gene copies an

141 individual carries and their combination of reference (0) and insertion (1) alleles at the loci  
 142 characterized by the chr19-ins and chr7-ins alleles. Among the 51 females in our sample, 46  
 143 were classified as low PC1 and five were middle PC1, none of which carried the *gsdf* duplication  
 144 nor any of the insertion alleles.

| <i>gsdf</i> copies | chr19-ins genotype | chr7-ins genotype | All males | Low PC1 males | Middle PC1 males | High PC1 males | Females |
|--------------------|--------------------|-------------------|-----------|---------------|------------------|----------------|---------|
| 2                  | 0/0                | 0/0               | 5         | 5             | 0                | 0              | 51      |
| 3                  | 0/0                | 0/0               | 481       | 177           | 127              | 177            | 0       |
| 4                  | 0/0                | 0/0               | 20        | 4             | 6                | 10             | 0       |
| 2                  | 0/1                | 0/0               | 59        | 38            | 21               | 0              | 0       |
| 2                  | 1/1                | 0/0               | 2         | 2             | 0                | 0              | 0       |
| 2                  | 0/0                | 0/1               | 23        | 14            | 9                | 0              | 0       |
| 3                  | 0/1                | 0/0               | 3         | 1             | 2                | 0              | 0       |
| 2                  | 0/1                | 0/1               | 1         | 1             | 0                | 0              | 0       |
| 3                  | missing            | 0/0               | 2         | 1             | 0                | 1              | 0       |

145 The duplicated *gsdf* Y allele, which we call *gsdf*-dup, does not determine sex in all males: 90 of  
 146 the 596 males (15%) are homozygous unduplicated, while 20 (3%) are apparently homozygous  
 147 duplicated (2x relative sequence depth). To establish whether another locus might control sex in  
 148 the males lacking *gsdf*-dup, we carried out a second sex GWAS with the 51 females and 90  
 149 males without the duplication. This revealed a region on chromosome 19 with multiple SNPs  
 150 that were highly significant, the highest of which (position 21,581,905,  $\log_{10}$  p-value =  
 151 6.327883e-15) is located 77 bp upstream of the *e2f2* gene (Figure 1a). The inferred ancestral  
 152 allele at this SNP was found exclusively among males across 59 heterozygotes and 3  
 153 homozygotes, suggesting a second XY system (Supplemental Table 2). We inspected the  
 154 genomic region harboring variants in high linkage disequilibrium (LD) with the SNP to determine



155 whether it was tagging any other variants having an even stronger sex association not detected  
156 by the GWAS, which was limited to biallelic SNPs. We discovered one such variant, a 700 bp  
157 insertion at position 21,572,413, which is located 1.7 kb upstream of the *id3* gene  
158 (Supplementary Figure 2). This male-exclusive insertion, hereafter called chr19-ins, is found in  
159 62 of the 90 males without *gsdf*-dup, of which 60 are heterozygotes and two are homozygotes.  
160 There are also three males with *gsdf*-dup that are heterozygous for chr19-ins. The additional  
161 sequence inserted in chr19-ins occurs in 37 places across 17 chromosomes and two unplaced  
162 scaffolds of the reference genome (blastn evalue = 0, > 96% identity, 100% coverage), and  
163 matches an LTR/Unknown family transposable element (blastn evalue = 0, 97% identity, 99%  
164 coverage) identified by repeatModeler2. At a more relaxed level of identity this transposable  
165 element is found in 126 places spread across all chromosomes and eight scaffolds of the  
166 reference genome (blastn evalue = 0, > 92% identity, 100% coverage).

167 Since there remain 28 males carrying neither *gsdf*-dup nor chr19-ins, we repeated the GWAS  
168 procedure a third time, yielding another highly significant region of association on chromosome  
169 7 around *gsdf* (Figure 1a). The most significant individual SNP in this case is approximately 371  
170 kb upstream of *gsdf* (position 17,718,711,  $\log_{10}$  p-value = 1.386670e-11), with a derived allele  
171 exclusively in males; 19 of the 28 males are heterozygous and one is homozygous  
172 (Supplemental Table 2). This pattern is consistent with a third Y allele that affects the *gsdf* gene  
173 independently of the *gsdf* duplication. Further investigation in the window of elevated LD with  
174 this top GWAS SNP revealed a 5 kb insertion at position 18,086,980, hereafter called chr7-ins,  
175 located just 2.5 kb upstream of *gsdf*. This insertion is again exclusive to males including all with  
176 the chr7:17718711 derived allele as well as three additional males without any previously  
177 identified Y allele. Two subregions of the chr7-ins sequence, one 638 bp and the other 510 bp,  
178 are respectively found at 19 and 18 places throughout 15 chromosomes and three unplaced  
179 scaffolds of the *A. calliptera* reference genome (blastn evalue = 0, >90% identity, 100%  
180 coverage). RepeatModeler2 assigns them both to the ends of an unknown repeat family,  
181 indicating that the chr7-ins insertion was also introduced by a transposable element. There  
182 remain 5 males (0.8% of 596) not carrying any of the three putative Y alleles (*gsdf*-dup,  
183 chr19-ins, chr7-ins). These results showing all genotypes are summarized in Table 1.

184 It has been reported that B chromosomes can act dominantly to determine female sex in some  
185 rock-dwelling Mbuna Lake Malawi cichlids (Clark *et al.*, 2017; 2018; 2019). We therefore  
186 examined whether any of our Lake Masoko samples contained excess sequence indicative of B

187 chromosomes, as defined in Clark *et al.* (2018). None of our samples showed any such excess,  
188 indicating that B chromosomes do not contribute to sex determination in this system.

189 *Gsdf* is expressed at higher levels in individuals carrying *gsdf*-affected Y alleles

190 Comparison of gene expression in the gonads of two adult male and two adult female *A.*  
191 *calliptera* shows seven-fold higher *gsdf* expression in males than in females (Figure 2a),  
192 consistent with observations in other fish species of higher levels of *gsdf* in testis than ovary  
193 (Zhu *et al.*, 2018). Furthermore, male carriers of *gsdf*-dup and chr7-ins, the latter which could  
194 plausibly be in a promoter region of *gsdf* given its upstream proximity, express *gsdf* in  
195 non-gonadal tissues (liver, eye, gill and anal fin) at substantially higher levels than males lacking  
196 these alleles (Figure 2b & Supplementary Figure 3). Thus, we infer that higher *gsdf* expression  
197 resulting from more copies of the actual gene itself or changes to a regulatory element triggers  
198 masculinization in Masoko *A. calliptera*. In contrast, the inserted chr19-ins sequence upstream  
199 of *id3*, the nearest gene to this insertion, did not show any associated changes in expression. It  
200 remains unclear how this variant results in masculinization.

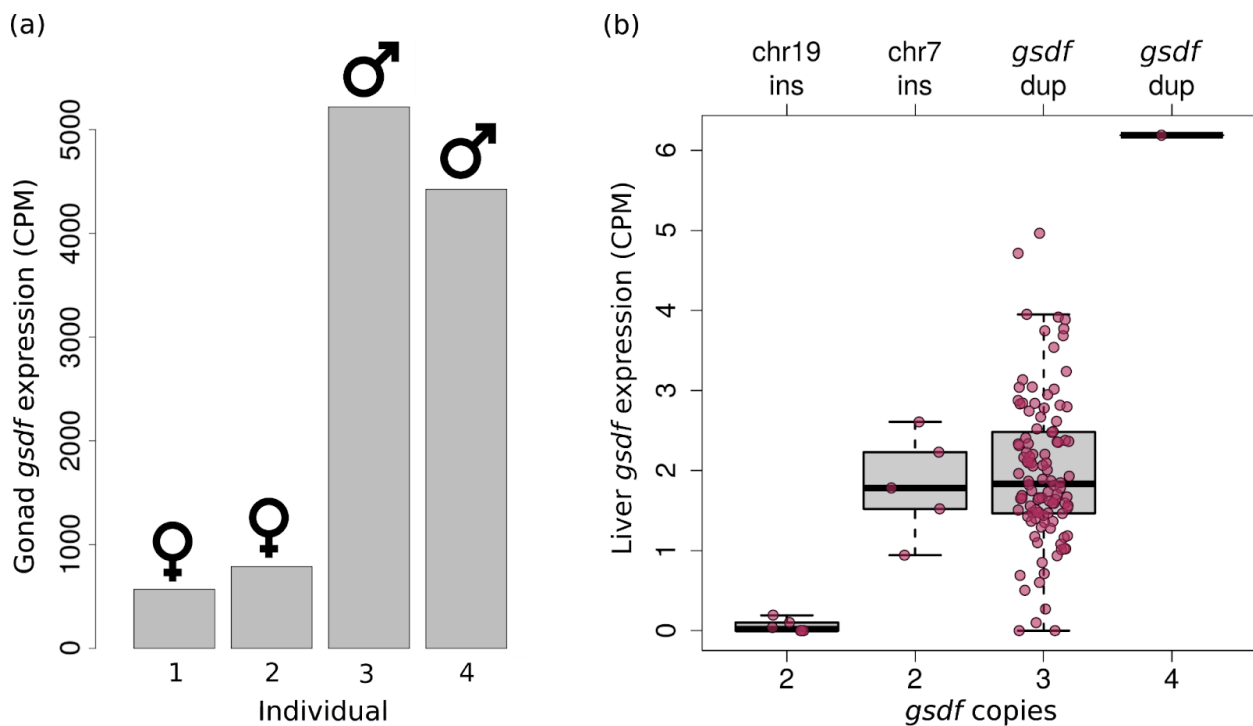

201 **Figure 2: Expression of *gsdf*.** (a) Expression levels of *gsdf* in the gonads of two male and two  
202 female *A. calliptera* reveals approximately seven times higher *gsdf* expression in males. (b)



203 Comparison of *gsdf* expression levels in the livers of Masoko male *A. calliptera* heterozygous  
 204 (three copies) and homozygous (four copies) for the *gsdf* duplication and males lacking the  
 205 duplication (two copies) but who carry Y alleles generated through insertions on chromosomes  
 206 7 and 19. The chromosome 7 insertion (chr7-ins) is directly upstream of *gsdf*, potentially in a  
 207 regulatory element of this gene. Thus, all males carrying Y alleles resulting from mutations  
 208 thought to affect *gsdf* express this gene more than other males on average. Gene expression  
 209 was quantified as counts per million reads (CPM).

## 210 Differential use of Y alleles in Lake Masoko

211 A principal component analysis (PCA) of the SNP data for the Lake Masoko samples reveals a  
 212 primary axis of genetic variation distinguishing the benthic from littoral ecomorph (Figure 3a),  
 213 and this axis is strongly correlated with catch depth (Supplementary Figure 4). There is a tight  
 214 cluster of samples at high principal component 1 (PC1) corresponding to the benthic ecomorph.  
 215 For the purposes of this paper we denote fish with PC1 > 0.4 as genetically benthic, and those  
 216 with PC1 < 0.4 as genetically littoral. The genetically littoral fish are more broadly distributed in  
 217 the PCA plot, consistent with varying degrees of benthic admixture (Supplementary Figure 5),  
 218 and for some analyses below we partition them into a “low PC1” subgroup with PC1 < -0.02,  
 219 and a “middle PC1” group with -0.02 < PC1 < 0.4.

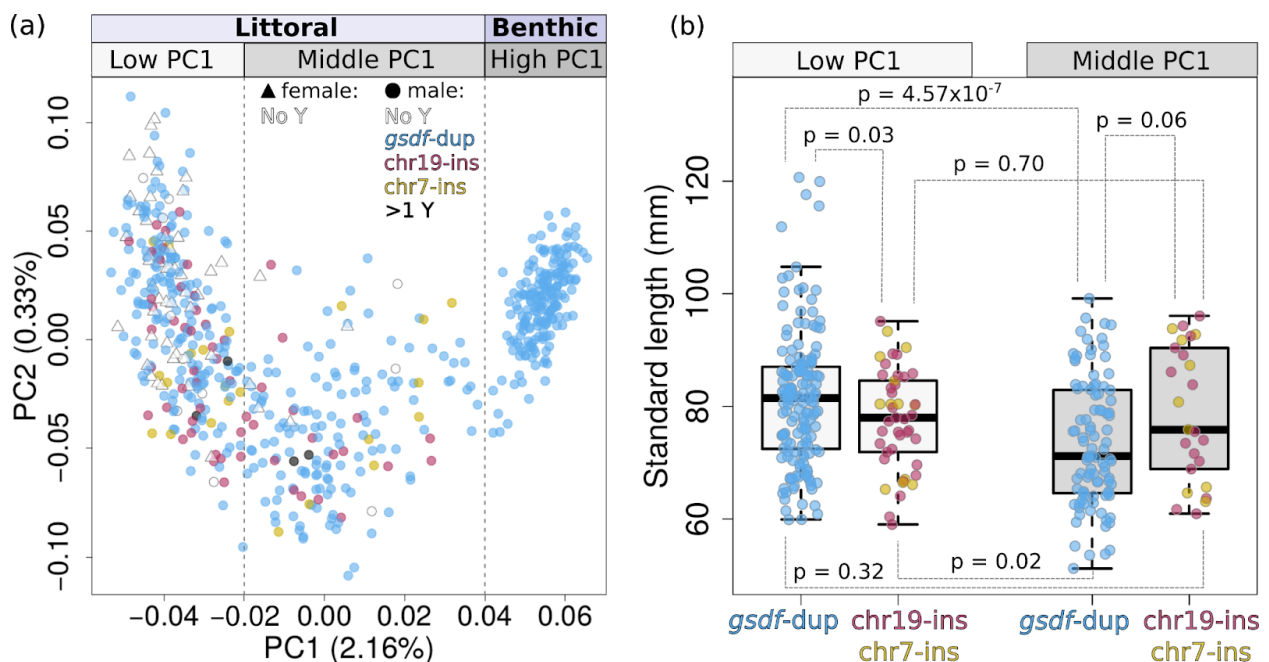

220 **Figure 3: Genetic characterization of Masoko *A. calliptera*. (a)** The first two components  
221 from a principal component analysis of the genome-wide variation among *A. calliptera* from  
222 Lake Masoko shows different Y allele usage between fish belonging to distinct genetic clusters.  
223 The points represent individuals and their colours denote which of the sex determining alleles  
224 identified from the GWAS individuals carry. PC1 separates fish adhering to the benthic  
225 ecomorph from littoral morph fish. The dashed grey lines show the demarcations that were used  
226 to classify fish as low, middle, and high PC1, which corresponds to their level of benthic  
227 ancestry across the genome. **(b)** Comparisons between the standard lengths of littoral males  
228 heterozygous for *gsdf*-dup versus males heterozygous for chr19-ins or chr7-ins shows an  
229 interaction between Y allele type and benthic admixture levels on body size. Males carrying  
230 more than one type of Y allele were excluded. Two-tailed t-tests were used to test for significant  
231 differences between the lengths of males characterized by different genetic PC1 background  
232 and Y allele combinations (p-values shown).

233 The genetically benthic fish were almost exclusively found in deep waters (> 20 metres), with  
234 just three of 188 individuals at intermediate depth (5-20 metres). The genetically littoral fish  
235 were found predominantly at shallow (< 5 metres) and intermediate depths, though there were  
236 some littoral fish caught in deep water, with a strong bias for these to be amongst fish with  
237 higher PC1 values: in particular, amongst the 289 low PC1 subgroup individuals 138 were  
238 caught shallow, 114 at intermediate depth, and 6 deep, while out of the 170 middle PC1  
239 subgroup individuals 25 were caught shallow, 63 at intermediate depth, and 46 deep.

240 Interestingly, all 188 genetically benthic males carried the *gsdf* duplication compared to 318/408  
241 (78%) of the remaining males (Figure 3a); this deviates significantly from a null hypothesis in  
242 which the frequency of males using *gsdf*-dup is independent of PC1 ( $\chi^2_1 = 7.35$ ,  $p = 0.007$ ).  
243 Correspondingly, the chr19-ins and chr7-ins alleles are only present in the genetically littoral  
244 males, at respective frequencies of 8.2% and 2.9%.

#### 245 *Antagonism between Y alleles and admixture*

246 Fish grow throughout life, and there is evidence that physical size is a correlate of resource  
247 holding potential and reproductive success in males of African mouthbrooding cichlids  
248 (Hermann et al., 2015; Nelson, 1995; Sefc, 2011) where even a 1 mm size difference can  
249 severely impact an individual's chances of winning bouts of male-male aggression (Turner &

250 Huntingford, 1986). In Lake Malawi haplochromine cichlids specifically, body size is a key  
251 predictor of the ability to successfully hold essential breeding territory from which to court  
252 females (Markert & Arnegard 2007). Even in the absence of male-male competition, at least in  
253 the case of South American convict cichlids, females prefer to mate with larger males  
254 (Dechaume-Moncharmont *et al.*, 2011), thus there is substantial evidence to suggest that male  
255 cichlids may commonly benefit from being larger.

256 In Lake Masoko, the genetically littoral male fish tend to be smaller as their amount of benthic  
257 ancestry increases (Supplementary Figure 6, Supplementary Table 3). This decrease in size  
258 with greater benthic admixture is significantly influenced by the type of Y allele that a male  
259 carries (ANOVA  $F = 3.66$ ,  $p = 0.027$ , comparing a linear model with interaction between genetic  
260 PC1 and Y allele to a model with no interaction term). Chr19-ins males and chr7-ins males are  
261 the same size in both low and middle PC1 subgroups (low PC1 two-tailed  $t = -0.40$ ,  $p = 0.70$ ,  
262 middle PC1 two-tailed  $t = -0.24$ ,  $p = 0.81$ ), and together their size remains stable regardless of  
263 the level of benthic ancestry (two-tailed  $t = 0.38$ ,  $p = 0.7$ , Figure 3b). In contrast, *gsdf*-dup males  
264 with middle PC1 genetic ancestry are significantly smaller than those with low PC1 ancestry  
265 (two-tailed  $t = 5.21$ ,  $p = 4.57 \times 10^{-7}$ ). This size difference for *gsdf*-dup males is so pronounced that  
266 while they are significantly larger than males using the other two Y alleles on the low PC1  
267 background (two-tailed  $t = 2.24$ ,  $p = 0.03$ ) they tend to be smaller in an intermediate PC1  
268 background. In contrast, the *gsdf*-dup genetically benthic (high PC1) males do not suffer from  
269 the size deficit seen in *gsdf*-dup middle PC1 males (Supplementary Figure 7a). Males  
270 homozygous for *gsdf*-dup are on average 81 mm long, which is no different than heterozygotes  
271 (two-tailed  $t = -0.48$ ,  $p = 0.64$ ), and so by this proxy are equally fit.

272 Because PC1, which reflects benthic genetic content, is correlated with fish capture depth, we  
273 examined whether there could be an interaction between environment and genotype  
274 contributing to these size differences. Interestingly, while the *gsdf*-dup males with middle PC1  
275 ancestry are smaller at all catch depths, chr19-ins and chr7-ins males with middle PC1  
276 backgrounds are noticeably larger at depths greater than five metres (Supplementary Figure  
277 7a). This larger size of the deeper-caught chr19-ins and chr7-ins middle PC1 males is  
278 counteracted by their shallow-caught counterparts tending to be the overall smallest,  
279 contributing to these males appearing similar in size across genetic backgrounds when not  
280 accounting for depth. Despite numbers of some categories being low, this three-way interaction  
281 between the depth at which fish are caught, Y allele type, and level of benthic ancestry, is

282 borderline significant in its ability to predict fish length (ANOVA  $F = 3.02$ ,  $p = 0.05$ ), suggesting  
283 that depth is relevant in contextualizing how different genetic combinations relate to body size,  
284 and therefore fitness.

285 If the low PC1 and middle PC1 fish were sufficiently separated from each other genetically,  
286 these differences in size would be expected to lead to differences in the fraction of littoral males  
287 carrying the rarer insertion alleles at greater depth or PC1 values. However, a three-way  
288 interaction between PC1 (restricted to low and middle PC1), catch-depth, and Y allele type is  
289 not significant in modeling the frequency of males ( $\chi^2_2 = 0.08$ ,  $p = 0.96$ ), nor are interactions  
290 between Y allele type and depth or PC1 (Wald test  $z = -0.85$  to  $1.16$ , all  $p$ -values  $> 0.25$  in the  
291 homogeneous association model of male frequency, which includes all pairwise interactions  
292 between depth, Y allele and PC1) (Supplementary Figure 7b). Indeed, pooled across depths,  
293 *gsdf*-dup males are 3.5x more common than males carrying either of the other two Y alleles  
294 among fish with low PC1 genetic backgrounds and 3.9x more common among middle PC1  
295 males (difference not significant, Fisher's exact test  $p = 0.45$ ).

296 Although the results of the last paragraph fail to provide direct evidence of a selective benefit for  
297 the Y insertion alleles at deeper depths or highly admixed genetic backgrounds in terms of allele  
298 frequency differences, it is noteworthy that elevated linkage disequilibrium (LD) extends for  
299 hundreds to thousands of kilobases from the strongest sex-associated GWAS SNPs tagging  
300 chr19-ins and chr7-ins (Supplementary Figure 2). To quantify this extent of LD we measured the  
301 mean squared physical distance between the chr19-ins and chr7-ins tagging SNPs and other  
302 SNPs that were within a megabase and in strong LD ( $r^2 > 0.5$ ) with these focal SNPs; these  
303 values are in the 81st and 87th percentiles respectively compared to other randomly-sampled  
304 focal SNPs across the genome with the same allele frequencies. This is consistent with  
305 long-range LD generated by recent positive selection, suggesting that either the  
306 sex-determining variants or another locus that they are physically linked to could be the target of  
307 selection.

### 308 *Distribution of sex-determining alleles across the Lake Malawi cichlid radiation*

309 We next investigated the presence of these Y alleles in other species from the Malawi radiation  
310 for which we have sequenced samples. The *gsdf* duplication is seen in 100 additional species,  
311 suggesting that it is old and may correspond to the major male-determining allele in the chr7 XY

312 system observed to act previously in multiple Lake Malawi cichlid species (Parnell & Strelman,  
 313 2013; Ser *et al.*, 2010) (Supplementary Table 5). However, its use in sex determination appears  
 314 to be quite dynamic; for example, it was not seen in the entire sample of 32 *A. calliptera* males  
 315 from crater lake Itamba near to Lake Masoko (Figure 4a), and it has been lost or gained multiple  
 316 times within the *Maylandia* genus (Figure 4b).

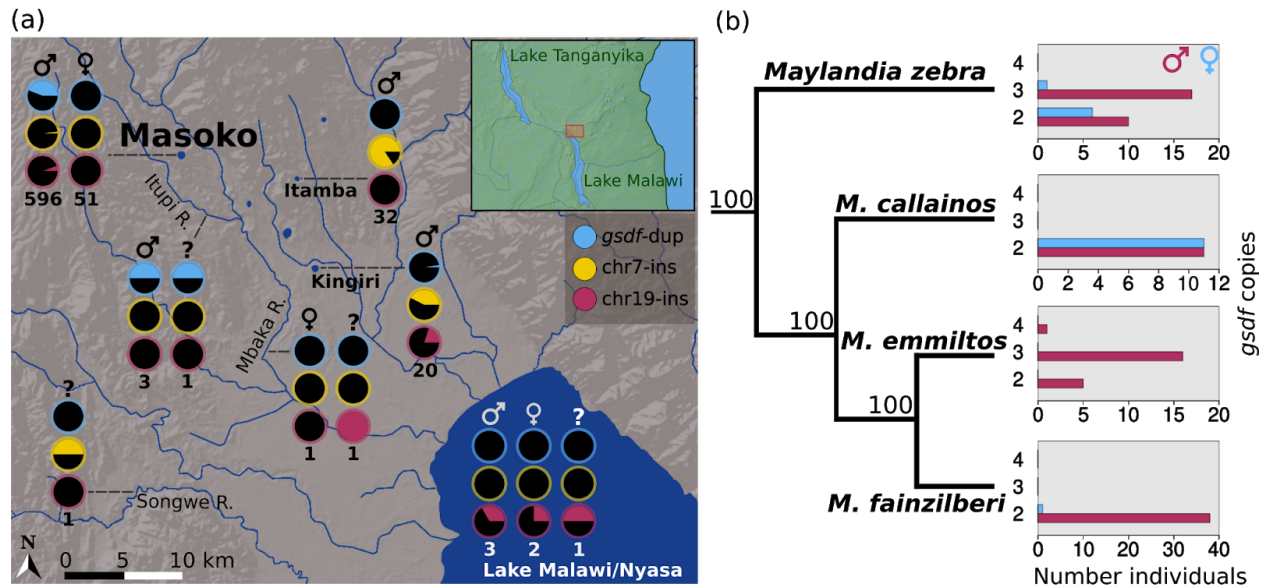

317 **Figure 4: Geographic and taxonomic distribution of Y alleles.** (a) The frequency of the  
 318 *gsdf-dup*, *chr7-ins*, and *chr19-ins* alleles among *A. calliptera* males, females, and individuals of  
 319 unknown sex sampled from lakes and rivers throughout Tanzania and Malawi suggests varied  
 320 usage of these alleles as sex determiners. The sample sizes for each sex and locality are  
 321 indicated under pie charts of allele frequencies. (b) The frequency of male (blue) and female  
 322 (maroon) individuals from four *Maylandia* species that are either heterozygous (three copy),  
 323 homozygous (four copy), or lacking (two copy) the duplicated *gsdf* allele exemplifies the  
 324 dynamic role of *gsdf-dup* in sex determination across the Malawi cichlid radiation. The presence  
 325 of the *gsdf* duplication in relation to the neighbor-joining species tree, rooted using the  
 326 distantly-related outgroup *Rhamphochromis longiceps*, suggests that the *gsdf* duplication has  
 327 been lost or gained at least twice during the diversification of the *Maylandia* lineage.  
 328 Additionally, the *gsdf* duplication is found in both sexes of *M. zebra*, although at significantly  
 329 different frequencies (Fisher's exact test  $p = 0.035$ ), consistent with it playing a role in sex  
 330 determination in this population.



331 Among our specimens, the chr19-ins allele is exclusive to *A. calliptera*, and is geographically  
332 widespread, occurring in populations from another Tanzanian crater lake, Kingiri (Figure 4a), as  
333 well three other lakes, and five rivers (Supplementary Table 5) that span an area extending  
334 south and north of Lake Malawi. Among the 20 non-Masoko chr19-ins carriers for which we  
335 have sex information, 18 were chr19-ins heterozygote males from the Bua River and lakes  
336 Kingiri, Malombe, Chilwa, and Malawi, and two were heterozygote females from the Salima  
337 population of Lake Malawi and the Ruvuma River.

338 The chr7-ins allele occurs in other lake and riverine populations of *A. calliptera* mostly from the  
339 regions surrounding northern Lake Malawi except for one southern Lake Malawi population  
340 (Southwest Arm). Among 20 Lake Kingiri males 55% are heterozygous for chr7-ins and 15% are  
341 homozygous, while in 32 Lake Itamba males 31% are heterozygous and 69% are homozygous  
342 (Figure 4a and Supplementary Table 5). The high frequency of chr7-ins homozygotes,  
343 particularly in Itamba, suggests that this variant is either not sex determining or is being  
344 epistatically masked by a feminizing allele in these populations. We also detected the chr7-ins  
345 variant in nine species from the genus *Tropheops* and two *Pseudotropheus* species  
346 (Supplementary Table 6). Both genera are endemic to Lake Malawi and belong to the Mbuna  
347 clade that is phylogenetically close to *A. calliptera* (Malinsky *et al.*, 2018). Small sample sizes of  
348 both males and females for these species and the coincidence of both the *gsdf*-duplication and  
349 chr7-ins make it difficult to confidently discern whether chr7-ins could be involved in sex  
350 determination, although there is an indication in some cases. For instance, in *Tropheops* sp.  
351 'Chilumba' and *Tropheops* sp. 'mauve' there are males heterozygous for chr7-ins without a  
352 duplicated *gsdf*, however there are no females for comparison. Such a male is also found from  
353 *Tropheops* sp. 'black' but in this species, and *Tropheops* sp. 'white dorsal', females occur that  
354 carry both *gsdf*-dup and chr7-ins. While sexing errors could be responsible, a potentially more  
355 plausible explanation is the presence in *Tropheops* of a dominant female-determining variant at  
356 another locus, given that females with either or both chr7-ins and *gsdf*-dup are observed  
357 multiple times. Of the two *Pseudotropheus* species positive for chr7-ins, only one,  
358 *Pseudotropheus fuscus*, had sexed individuals; 2/2 males are heterozygous for chr7-ins and  
359 have an unduplicated *gsdf*, while the only female lacks both *gsdf*-dup and chr7-ins, which is  
360 consistent with chr7-ins being male-determining.

## 361 Discussion

362 Our genome-wide survey for genetic associations with sex revealed that there are three putative  
363 XY determination systems segregating within a single natural population of *Astatotilapia*  
364 *calliptera* from the crater lake Masoko. Among these, two are associated with *gsdf* on  
365 chromosome 7: the duplication present in 85% of males, which is the primary mechanism, and  
366 an upstream insertion present in 4% of males. The third Y allele is characterized by an insertion  
367 on chromosome 19 in 11% of males. These systems are used differentially between the  
368 divergent ecomorphs in the lake, with the deep-water benthic morph only using the duplication,  
369 while littoral fish use all three systems.

370 Although use of multiple sex determination systems might seem likely to create sex-ratio biases,  
371 multiple Y alleles can coexist without problem in a population, with each male just carrying one  
372 of them, and females carrying none of them; Mendelian segregation in the offspring then gives  
373 50% males with the paternal Y and 50% females. Indeed, we saw no females with any of the Y  
374 alleles. However in our larger set of males we did detect some that carried two Y alleles,  
375 including males homozygous for the *gsdf* duplication and others with two different Y alleles,  
376 suggesting that there are some females carrying Y alleles present in the broader population. A  
377 possible explanation for this is that a dominant ZW system may also be present at low  
378 frequency, in which a dominant feminizing W allele acts epistatically to any of the Y alleles, as  
379 seen in some other Lake Malawi cichlid species (Parnell & Streelman, 2013; Ser *et al.*, 2010).  
380 We did not detect such a W allele in our association scans, possibly because the number of  
381 females in our data set did not give sufficient power to detect it at the frequency which would  
382 explain our observations. Alternatively, there could be incomplete penetrance of the duplication  
383 allele, or genetically male fish could rarely undergo environmentally-induced sex reversal, which  
384 has been documented in more taxonomically distant cichlids (Baroiller *et al.*, 1995).

385 Complete genomic sequencing of many wild individuals enabled us to identify the likely causal  
386 genetic mechanisms creating new Y alleles and corroborate the suspicion by Peterson *et al.*  
387 (2017) that *gsdf* is a sex determination locus in *A. calliptera*. Our findings indicate that the  
388 tandem duplication of *gsdf* and the proximal upstream insertion both boost *gsdf* expression,  
389 consistent with leading to masculinization as shown in *Oryzias* (Myosho *et al.*, 2012).  
390 Upregulated *gsdf* expression appears to be generally important for testicular development in fish  
391 (Matsuda & Sakaizumi, 2016) and *gsdf* has been reported as a sex determiner in multiple fish  
392 species (Einfeldt *et al.*, 2021; Jiang *et al.*, 2016; Kaneko *et al.*, 2015; Myosho *et al.*, 2012).  
393 Recycling of this gene for sex determination through repeated distinct mutations is evidence for



394 evolutionary conservation of the genetic pathways controlling sex even as the specific sex  
395 determining alleles turn over (see Bachtrog *et al.* 2014 and Vicoso 2019 for discussion on this  
396 topic). The second gene we identified, *id3*, has not previously been directly associated with sex  
397 determination, and while we believe we have identified the responsible mutation we cannot be  
398 certain of the affected gene.

399 The genetic mechanisms generating the Masoko Y alleles parallel those involved in the origin of  
400 the *dmy/dmrt1bY* male determining gene in *Oryzias latipes*, which arose from a duplication of  
401 *dmrt1*. Two transposable elements (TEs) introduced transcription factor binding sites upstream  
402 of the *dmrt1b* paralog, which altered its expression leading to it becoming the master  
403 sex-determining gene (Herpin *et al.*, 2010; Scharl *et al.*, 2018). Similarly, both the chr19-ins and  
404 chr7-ins Y alleles were created by TE insertions directly upstream of the *id3* and *gsdf* genes  
405 respectively, offering support for the notion that TEs may play a potent role in rewiring the  
406 expression of genes to function as sex determiners (Dechaud *et al.*, 2019).

407 Usage partitioning among three different Y alleles within a single, isolated population provides a  
408 striking example of how dynamic sex determination is in African cichlids. This complements  
409 recent work showing that across the Lake Tanganyika cichlid radiation sex systems turn over at  
410 a higher rate than previously established for vertebrates (El Taher *et al.*, 2020). Previous studies  
411 showed that multiple sex determination systems can segregate within captive families involving  
412 crosses between Lake Malawi species (Parnell & Streebman, 2013; Ser *et al.*, 2010), but did not  
413 characterize their distributions within natural populations. Our results from Lake Masoko allow  
414 us to explore how multiple co-occurring sex systems segregate in the wild, and their relationship  
415 to subpopulation structure.

416 All of the variants that we identified for controlling sex also exist outside of Lake Masoko. The  
417 presence of *gsdf*-dup across all major clades of the Lake Malawi radiation, except for  
418 *Diplotaxodon* and *Rhamphochromis*, suggests that it either predated the radiation or arose early  
419 in it. Despite this, the *gsdf* duplication has not fixed, instead showing evidence of gains and loss  
420 at fine taxonomic scales within genera and even species. In contrast, chr19-ins and chr7-ins are  
421 both far more taxonomically constrained, with chr19-ins exclusive to *A. calliptera*, despite being  
422 widespread geographically. This suggests that these variants, although at low frequency, are  
423 also old and in the case of chr7-ins could have been introduced into *Tropheops* and  
424 *Pseudotropheus* through introgression. Another possibility is that chr7-ins, seen in 11/69 (~16%)

425 of the uniquely-classified Mbuna species (2/14 genera) in our dataset, could have arisen in a  
426 common ancestor of *A. calliptera* and Mbuna and remained as a minor sex-determining player  
427 in comparison to *gsdf*-dup, which we detected in ~72% of the Mbuna species (11/14 genera).  
428 This scenario would suggest that *gsdf*-dup may be selectively advantageous over chr7-ins in  
429 most circumstances, while there are some conditions that favour chr7-ins. A common feature of  
430 all of the Y alleles we identified is that outside of Masoko they do not always appear to  
431 determine sex, suggesting that multifactorial sex determination is common and highly variable  
432 with respect to which alleles serve as the major sex determiners, even in closely related  
433 species. Having identified some of the precise variants influencing sex differentially across the  
434 radiation enables future studies into the evolutionary factors supporting their turnover at a  
435 variety of evolutionary scales.

436 Our results raise the question of which eco-evolutionary contexts promote the invasion and  
437 eventual maintenance or loss of new sex determining variants. Theorized evolutionary  
438 mechanisms contributing to sex system turnover include resolving sexually antagonistic traits  
439 (van Doorn & Kirkpatrick, 2007), escape from deleterious mutational load (Blaser *et al.*, 2013),  
440 selection on sex ratios (Eshel, 1975), genetic drift (Saunders *et al.*, 2018), and transmission  
441 distortion (Clark & Kocher, 2019; Werren & Beukeboom, 1998). In considering how our findings  
442 align with such models it is important to recognize that we are only observing a snapshot of  
443 whatever dynamics may be occurring in Masoko, rather than seeing the evolutionary trajectories  
444 of Y allele usage.

445 Under the classic model of sexually antagonistic selection (van Doorn & Kirkpatrick, 2007),  
446 autosomal alleles with differential fitness effects between sexes gain an advantage if they  
447 become linked to a new sex determination locus, thus coupling the male-benefiting allele with  
448 males and vice versa. The resulting linkage disequilibrium can be reinforced in the long term  
449 through reduced recombination in the region containing the sex-determining and sexually  
450 antagonistic loci. When multiple sex loci co-occur in a population as in our case, the Y allele  
451 conferring the greatest fitness advantage to males will spread.

452 We found evidence of an antagonistic relationship in terms of body size between the different Y  
453 alleles and genetic PC1 in littoral males. In cichlids, larger size confers higher fitness to males  
454 by providing them with an advantage in defending spawning sites and procuring access to  
455 reproductively active females (Hermann *et al.*, 2015). In the shallow waters where spawning

456 littoral fish have been observed, the frequencies of males characterized by different  
457 combinations of Y alleles and levels of benthic ancestry correlate well with their average size:  
458 *gsdf*-dup males with low benthic ancestry (low PC1) are largest and most common compared to  
459 males that either carry the chr19-ins or chr7-ins Y alleles or have more benthic ancestry (middle  
460 PC1). This suggests that in shallow water among males with low levels of benthic ancestry,  
461 *gsdf*-dup males have a fitness advantage over males that carry the rarer Y alleles. This size  
462 advantage disappears however in fish with an increased benthic ancestry component, with  
463 middle PC1 *gsdf*-dup males being smaller by nearly 8 mm on average. Furthermore, in waters  
464 deeper than five metres, among the fish with middle PC1 ancestry, chr19 and chr7 insertion  
465 males actually gain a size advantage over *gsdf*-dup males. These size differences are all  
466 greater than the level known to be sufficient for preventing smaller males of another African  
467 cichlid species from being able to effectively compete for territories (Turner & Huntingford,  
468 1986). In *A. calliptera* specifically, body size has been shown to significantly influence  
469 male-male aggression, presumably because it signals the resource holding potential of  
470 competing males (Theis *et al.*, 2015). Therefore, we suggest that the insertion Y alleles may be  
471 maintained in the population by a relative advantage under these depth and genetic background  
472 conditions, while there is sufficient genetic mixing between the low and middle PC1 subgroups  
473 of littorals to prevent establishment of significant allele frequency differences.

474 We suggest two possible reasons, not mutually exclusive, for why the chr7-ins and chr19-ins Y  
475 alleles are not seen in the high PC1 benthic ecomorph. The first is that the PCA and admixture  
476 plots (Figure 3a, Supplementary Figures 4, 5) are consistent with an asymmetry of gene flow  
477 between the benthic and littoral ecomorphs, with the benthic ecomorph that is adapted to the  
478 cold, hypoxic environment at the bottom of the lake being genetically isolated with little if any  
479 gene flow from littorals into it, whereas there is gene flow from the benthics into littorals. This  
480 supports the cline of benthic admixture reflected in PC1 variation amongst the littorals. Second,  
481 even if there is hybridisation leading to low levels of gene flow into benthics, there are reasons  
482 to suggest it is sex-biased involving littoral females and benthic males. We never caught  
483 genetically benthic fish in the shallow depths where littorals breed, but we do see occasional  
484 genetic littorals in deep water. Benthic males appear to exclusively use the deep water mating  
485 territories that have been observed at the base of the crater wall, and we suggest that littoral  
486 males may be unable to compete successfully in this forbidding environment to which they are  
487 not adapted whereas littoral females may accept mating. In this scenario low frequency Y alleles  
488 from the littorals would not invade the benthics at an appreciable rate, and any that were

489 present in the founders or entered through rare hybridization events could have been easily lost  
490 by drift.

491 In conclusion, our discovery that at least three different alleles control sex and segregate  
492 differentially within an isolated population of *A. calliptera* provides evidence that genetic sex  
493 determination in nature can be extremely fluid even at very small demographic scales. All of the  
494 alleles we identified involved structural genetic variants, with two of the three generated by  
495 transposable element insertions, highlighting a potentially important role for TEs in the rapidly  
496 evolving sex systems of African cichlids, similar to their role in adaptive variation in opsin  
497 regulation (Carleton *et al.* 2020). Our results also indicate that genetic background differences  
498 likely created by admixture can bring about antagonistic relationships among males carrying  
499 different Y alleles, providing an evolutionary context that may favour multifactorial sex systems.  
500 This has interesting implications for the incipient speciation between littoral and benthic Masoko  
501 ecomorphs in that alternative Y alleles circumvent negative genetic interactions brought about  
502 by admixture, allowing for sustained back-crossing that reduces the level of divergence. It is  
503 possible that this contributes to the low genome-wide  $F_{ST}$  (4%) between the ecomorphs, which  
504 also lack fixed genetic differences, although there are tens of islands of high  $F_{ST}$  divergence  
505 potentially associated with loci under differential selection (Malinsky *et al.*, 2015). Admixture and  
506 relatively low divergence are hallmarks of the Malawi cichlid radiation, so it seems plausible that  
507 similar processes could exist or have existed elsewhere. The fact that we and other studies  
508 have found polygenic sex determination systems that differ markedly between closely related  
509 species and populations across the radiation supports this possibility.

## 510 **Methods**

### 511 *Samples and sequencing*

512 Fish were primarily collected by professional aquarium fish catching teams. Fish at a target  
513 depth range (determined by diver depth gauges) were chased into block nets by SCUBA divers  
514 and transferred to a holding drum, then brought to the surface, where they were euthanized with  
515 clove oil. The right pectoral fin of sampled individuals was then removed and stored in ethanol,  
516 and the remainder of the specimen pinned, photographed, labelled and preserved in ethanol for  
517 later morphological analysis. Standard lengths were measured using calipers. Females were  
518 distinguished from juvenile males among the smaller fish by visual inspection of the gonads

519 after opening the abdominal cavity. Adult males were identified from secondary sexual traits of  
520 larger size, brighter colour and possession of elongate filaments on the pelvic, dorsal and anal  
521 fins (confirmed to be reliable by visual inspection of the gonads in a number of specimens from  
522 earlier collections).

523 DNA was extracted from preserved fin clips using Qiasymphony DNA tissue extraction kits or  
524 PureLink® Genomic DNA extraction kits and samples were sequenced on the Illumina  
525 HiSeq2000 as in Malinsky *et al.* (2015) or on the HiSeqX in three batches: 1) 118 “ILBCDS”  
526 samples collected in 2011 sequenced at 3.9-19.2x coverage (median 7.5x), 2) 194 “CMASS”  
527 samples collected in 2014-2016 sequenced to 4.3-9.0x coverage (median 5.7x), 3) 336 “cichl”  
528 samples collected in 2014-2016 and 2018 sequenced to 12.0-23.2x coverage (median 15.8x).

529 One sample that was initially part of the study was removed following conflicting data being  
530 detected during the analysis. Further testing with our PCR assay of both the original tissue  
531 sample obtained in the field, and a second sample from the supposed same ethanol-preserved,  
532 whole specimen, produced one male and one female genotype respectively, indicating a  
533 labeling error (Supplementary Figure 1c).

534 RNA was extracted from the gonads of two male and two female *A. calliptera* collected from the  
535 Itupi River in 2016. To ensure accurate quantification of transcripts, we used PolyA selection on  
536 one male and one female sample and RNA depletion on the other male and female sample. The  
537 gonads were then sequenced using 75 bp paired-end reads on three lanes of the Illumina HiSeq  
538 2500 (SBS kit v4). Adapter sequences and bases with Phred quality below 20 were removed  
539 from the ends of gonad RNAseq reads using Trim Galore 0.6.2  
540 ([https://www.bioinformatics.babraham.ac.uk/projects/trim\\_galore/](https://www.bioinformatics.babraham.ac.uk/projects/trim_galore/)) and read quality was checked  
541 using FastQC 0.11.8 (<https://www.bioinformatics.babraham.ac.uk/projects/fastqc/>). We also  
542 extracted RNA from the anal fins, eyes, gills and livers of 151 *A. calliptera* collected from Lake  
543 Masoko in 2015, 2016 and 2018 (Supplementary Table 1), which was stored in RNALater, using  
544 Direct-zol™ RNA MiniPrep Plus kits (Zymo, R2072) with an additional Chloroform step before  
545 loading the sample onto filtration columns. RNA samples were quantified with the Qubit™ RNA  
546 HS Assay Kit and quality assessed on the Agilent 4200 TapeStation. Libraries were prepared  
547 using Illumina mRNA sequencing kits with polyA enrichment and sequenced using 100 or 150  
548 bp paired-end reads on three lanes of the Illumina HiSeq4000 and five S4 lanes of the Illumina  
549 NovaSeq. Adapter sequences and bases with Phred quality below 20 were removed from the

550 ends of all resulting RNAseq reads using Trim Galore 0.6.4 and read quality was checked using  
551 FastQC 0.11.9.

## 552 *Variant discovery*

553 Sequencing reads for all *A. calliptera* samples were mapped to a high-quality *A. calliptera*  
554 reference genome (fAstCal1.2, accession GCA\_900246225.3) (Rhie *et al.*, 2021) using  
555 bwa-mem 0.7.17 (Li, 2013). We used GATK 3.8 (McKenna *et al.*, 2010) to identify  
556 individual-level variation with the HaplotypeCaller program followed by joint genotype calling  
557 among all samples using GenotypeGVCFs (Poplin *et al.*, 2017; Van der Auwera & O'Connor,  
558 2020). Sites exhibiting any of the following indications of quality issues in the medium-coverage  
559 (~15x) “cichl” subset of 336 individuals were masked from all analyses: total sequencing depth  
560 across individuals more extreme than the genome-wide median total site depth (DP) +/-25%,  
561 fewer than 95% of individuals covered by at least five reads, root mean square mapping quality  
562 less than 40, an alternate allele assertion quality score below 30, excess heterozygosity (exact  
563 test p-value < 1e-4), biases between reference and alternate alleles in terms of strand (exact  
564 test p-value < 1e-6), base quality (z-score > 6), mapping quality (z-score > 6), and read position  
565 (z-score > 6). Sites spanning indels or having more than two alleles were also masked from  
566 analyses. Quality control for sites was carried out using the program vcfCleaner  
567 (<https://github.com/tplinderoth/ngsQC/tree/master/vcfCleaner>).

## 568 *Population genetic characterization*

569 We used principal component analysis (PCA) based on genotype posterior probabilities at the  
570 quality-controlled SNPs to characterize the distribution of *A. calliptera* genetic variation  
571 throughout Lake Masoko. Specifically, we used ANGSD 0.929 (Korneliussen *et al.*, 2014) to  
572 estimate minor allele frequencies from genotype likelihoods (-GL 1 model) calculated using  
573 reads with minimum base and map Phred qualities of at least 20. These minor allele frequency  
574 (MAF) estimates and genotype likelihoods were used to obtain genotype posterior probabilities  
575 for all individuals under a Hardy-Weinberg genotype prior. We used ngsCovar 1.0.2 (Fumagalli  
576 *et al.*, 2014) to estimate the genetic covariance matrix among individuals based on their  
577 genotype posteriors at SNPs with MAF greater than 5%, which we decomposed in R 3.6.3 (R  
578 Core Team, 2020) with the eigen() function. In addition, we used the program ADMIXTURE



579 1.3.0 (Alexander *et al.*, 2009) to infer the proportions of distinct genetic ancestry for individuals  
580 assuming two ancestral populations (K parameter).

### 581 *Genome-wide association tests for sex*

582 For statistical association testing we relaxed the excess heterozygosity filter to accept biallelic  
583 SNPs with exact test p-value  $> 1e-20$ , and queried all such SNPs across the genome with MAF  
584 of at least 5% for association with sex under the linear mixed model framework implemented in  
585 GEMMA 0.98.1 (Zhou & Stephens, 2012). Sex was treated as a binary response which we  
586 regressed against posterior mean genotypes calculated from the GATK genotype likelihoods  
587 using vcf2bimbam (<https://github.com/tplinderth/ngsQC/tree/master/vcfCleaner>) under a  
588 Hardy-Weinberg genotype prior. We accounted for confounding effects of ancestry among  
589 individuals through incorporating a centered pairwise kinship matrix calculated using GEMMA  
590 as a random effect in the LMM. We identified significantly associated loci using the  
591 likelihood-ratio test p-values from GEMMA run in the LMM mode at a 5% significance level after  
592 a Bonferroni correction for the number of tested SNPs. In order to identify as many  
593 sex-associated loci as possible, we iteratively tested conditional subsets of individuals who did  
594 not carry alleles significantly associated with sex from previous iterations, that is, subsets of  
595 individuals whose sex was not accounted for by other candidates.

### 596 *Characterizing sex-determining variants throughout Lake Masoko and the Malawi radiation*

597 We only used SNPs with GEMMA and so following the sex GWAS we checked for the presence  
598 of structural variants (SVs) that might have a stronger association with sex in 10 kb windows  
599 extending from the significantly associated SNPs. We extracted read mapping information  
600 directly from the BAM files to look for mapping signatures that would be consistent with  
601 structural variation, considering both read pair and depth information, using IGV 2.8.0 (Robinson  
602 *et al.*, 2011). We initially screened at least five males and five females for structural variation in  
603 IGV and then used a custom perl script to call SVs if at least 5% of read pairs among all  
604 individuals within 480 bp of any putative SV positions had mates which mapped to a different  
605 chromosome. We assembled the anomalously mapped read pairs across all individuals for each  
606 SV that we called using MEGAHIT 1.2.9 (Li *et al.*, 2016) and performed a blastn (Altschul *et al.*,  
607 1990; Camacho *et al.*, 2009) search of the resulting contigs against fAstCal1.2. This approach  
608 led to the discovery of the putative sex-determining insertions on chromosomes 7 and 19, which



609 blasted with at least 90% identity across their full length to multiple places across the genome.  
610 We used repeatModeler2 2.0.2 (Flynn *et al.*, 2020) with default options but including the  
611 -LTRStruct option to identify transposable element sequences in the fAstCal1.2 genome. Then  
612 we compared the SV contigs to these transposable element sequences to further characterize  
613 the insertions. The chr19-ins allele matched a 700 bp transposable element (blastn evalue = 0,  
614 97% identity, 99% coverage) identified by repeatModeler2 as belonging to an LTR/Unknown  
615 family. The two partial contigs of the chromosome 7 insertion matched with 94% identity  
616 (631/673 bp with 35/673 bp (5%) gaps) and 97% (496/509 bp with 11/509 bp (2%) gaps) to  
617 either end of a 3,947 bp unknown transposable element.

618 In order to characterize the presence or absence of the chromosome 7 and 19 insertions, we  
619 mapped sequencing reads from all Masoko *A. calliptera* to the assembled insertion sequences  
620 including 1 kb of upstream and downstream flanking sequence using BWA. We considered any  
621 reads mapping within the flanking regions and which spanned the insertion as reference allele  
622 reads (with respect to fAstCal1.2) and any reads which mapped within the insertion by a  
623 minimum of three bp as alternate allele reads. An individual's genotype was called  
624 heterozygous (0/1) if they possessed reads from both alleles that were each at a minimum  
625 frequency of 10%, otherwise, with more than 90% of either the reference or insertion reads,  
626 individuals were called as homozygous for the reference allele (0/0) or homozygous for the  
627 insertion allele (1/1), respectively. We also genotyped fish based on the copy number of the  
628 duplicated *gsdf*-containing locus which spans positions 18,079,155 to 18,100,834 of  
629 chromosome 7 in the fAstCal1.2 reference. For each individual, we translated their average  
630 sequencing depth across this region relative to their average sequencing depth from 38,320 bp  
631 flanking sequence (19,154 bp upstream and 19,166 bp downstream of the duplication  
632 breakpoints) into copy number in increments of 0.5x: Relative coverage of 1.25 or lower was  
633 recorded as a non-duplicated *gsdf* region, (1.25,1.75] as three *gsdf* copies, (1.75, 2.25] as four  
634 copies, and so on. Individuals with three and four copies of the *gsdf* locus were called  
635 heterozygous and homozygous for the duplication respectively. Though it is possible for a  
636 four-copy individual to have one chromosome with three *gsdf* copies this would necessitate  
637 another duplication and so is less parsimonious than the assumption that they are homozygous  
638 for a chromosome with two copies.

639 We also developed a PCR assay for the *gsdf* duplication (Supplementary Table 7), which we  
640 used to confirm its presence in a subset of *A. calliptera* and *Maylandia zebra*. Genomic DNA

641 was extracted from fin clips using PureLink Genomic DNA Mini Kits (ThermoFisher Scientific,  
642 K182001) following the manufacturer's protocols and eluted in 30-60  $\mu$ L elution buffer. We  
643 carried out PCRs in 20  $\mu$ L reaction volumes consisting of 1X Platinum™ II PCR Buffer, 0.2 mM  
644 of each dNTP (ThermoFisher Scientific, R0192), 0.2  $\mu$ M of each primer (Merck Life Science,  
645 desalted), less than 500 ng template DNA (1  $\mu$ L genomic DNA at  $\sim$ 1-5 ng/ $\mu$ L), 0.04 U/ $\mu$ L  
646 Platinum™ II Taq Hot-Start DNA Polymerase (ThermoFisher Scientific, No 14966001) and  
647 nuclease-free water. We amplified the DNA using the following thermal profile: 94°C for two  
648 minutes followed by 30-35 cycles of 94°C for 15 seconds, 60°C for 15 seconds, 68°C for 15  
649 seconds, and a final 68°C extension for five minutes. The PCR products were separated using  
650 electrophoresis run at 100 volts for 30 minutes on a 2% agarose gel.

651 We genotyped 1,552 additional individuals from all seven of the Lake Malawi radiation clades  
652 (*A. calliptera*, Mbuna, Benthic, Deep, Utaka, *Diplotaxodon*, and *Rhamphochromis*; see Malinsky  
653 *et al.* 2018) for the *gsdf* duplication as well as the chromosome 7 and 19 insertions in the same  
654 way as for Masoko *A. calliptera* described above. This set of Malawi radiation individuals  
655 represents 270 species (some are not formally established but recognized as distinct taxa) from  
656 48 genera, including *A. calliptera* from locations other than Lake Masoko. In order to  
657 characterize how the *gsdf* duplication is acquired and lost as lineages diversify we mapped its  
658 presence at different copy number in males and females to the species tree for four Mbuna  
659 species from the *Maylandia* genus: *M. zebra*, *M. callainos*, *M. emmiltos*, and *M. fainzilberi*. We  
660 generated the species tree using 12,133,030 genome-wide segregating sites among the four  
661 *Maylandia* species identified using GATK 3.8 in the same manner as for Masoko *A. calliptera*.  
662 These SNPs passed quality controls addressing abnormally low and high sequencing coverage  
663 and low mapping quality for the ingroup samples as well as for samples from the  
664 distantly-related species *Rhamphochromis longiceps*, which served as an outgroup. We used  
665 ngsDist 1.0.8 (Vieira *et al.*, 2016) to calculate a pairwise genetic distance matrix based on  
666 genotype likelihoods for all of the ingroup and outgroup samples, as well as to bootstrap sites in  
667 order to generate 100 additional bootstrap distance matrices. For this *Maylandia* species tree,  
668 we used fastME 2.1.6.1 (Lefort *et al.*, 2015) to infer neighbor-joining trees from the genetic  
669 distance matrices using the BIONJ algorithm with SPR tree topology improvement. RAXML-NG  
670 1.0.1 (Kozlov *et al.*, 2019) was used to determine the bootstrap support for the genome-wide  
671 tree.

## 672 *B chromosome assay*

673 In addition to autosomal sex loci, B chromosomes, which are supernumerary chromosomes not  
674 required for organismal function and variably present across taxa and individuals, have been  
675 implicated as sex modifiers in Lake Malawi cichlids (Clark *et al.*, 2017). Accordingly, we assayed  
676 for the presence of B chromosomes among Masoko *A. calliptera* to discern whether they may  
677 influence sex. B chromosome material initially derives from autosomes, so their presence can  
678 be detected through inflated read coverage in homologous regions of the reference genome  
679 where B reads mismatch. Accordingly, we assayed for B chromosomes based on inflated  
680 coverage at regions containing sequence known to exist on B chromosomes from Lake Malawi  
681 cichlids (Clark *et al.*, 2018). Regions identified as core B block sequence according to Clark *et*  
682 *al.* (2018) were translated into fAstCal1.2 coordinates and the mean coverage across each of  
683 these segments for each Masoko *A. calliptera* individual was calculated directly from the BAM  
684 files. We used a minimum coverage ratio for the core B region compared to the genome-wide  
685 average of 2x to call B positive individuals. None of the Lake Masoko *A. calliptera* passed this  
686 threshold although this process did identify individuals carrying B chromosomes from other  
687 species.

## 688 *Expression of sex-associated genes*

689 We mapped the quality-controlled liver, eye, gill, and anal fin RNAseq reads to the fAstCal1.2  
690 genome with STAR 2.7.3a (Dobin & Gingeras, 2015) and counted reads derived from  
691 sex-associated genes with featureCounts 2.0.1 (Liao *et al.*, 2014). These read counts were  
692 normalized to counts per million (CPM) reads using edgeR 3.30.3 (Robinson *et al.*, 2010). We  
693 mapped the quality-controlled gonad reads to the fAstCal1.2 reference using bwa-mem and  
694 counted reads derived from *gsdf* exons using SAMtools 1.9 (Li *et al.*, 2009) and ngsAssociation  
695 0.2.4 (<https://github.com/tplinderoth/ngsAssociation>) summarize, which were also normalized to  
696 CPM.

## 697 *Relationship between Y alleles and body size*

698 Genetic PC1 was used as a proxy for the degree of admixture since this component clearly  
699 separates fish based on their degree of benthic ancestry. Based on distinct clustering in the  
700 genome-wide PCA plot, fish with PC1 > 0.04 were classified as genetically benthic and those

701 with PC1 < 0.04 as genetically littoral. We further classified fish with the lowest amounts of  
702 benthic ancestry as “low PC1” (PC1 < -0.02), those with more equal amounts of littoral and  
703 benthic ancestry as “middle PC1” (PC1 range -0.02 to 0.04), and the clear benthic cluster as  
704 “high PC1” (PC1 > 0.04). The three Y alleles segregate in the littoral group only, which is  
705 composed of low and middle PC1 fish, yielding six possible Y and PC1 combinations when  
706 excluding the 0.7% of males that carry more than one type of Y. For all analyses related to fish  
707 size we considered only males that were heterozygous for their Y allele (except when we  
708 compared the length of *gsdf*-dup homozygotes to *gsdf*-dup heterozygotes). We tested the  
709 hypothesis that littoral Lake Masoko *A. calliptera* males with different ancestry backgrounds and  
710 Y allele combinations differ in standard length using pairwise two-tailed t-tests in R.

711 We investigated whether the size of littoral males is influenced by interactions between Y allele  
712 and ancestry regime by fitting linear models of standard length as a function of Y allele and PC1  
713 class in R using `glm()`. We tested whether the interaction provides a significantly better fit with  
714 the `anova()` F-test by comparing the residual sums of squares between a model with only main  
715 effects to a model with main effects and an interaction between Y allele type and PC1 class. We  
716 also introduced a depth class variable into our models to investigate whether the depth at which  
717 fish were caught plays a role in explaining their length. Depths less than five metres were  
718 considered “shallow”, depths ranging from 5-20 metres were “intermediate”, and depths more  
719 than 20 metres were “deep”. As before, we compared the fit of a saturated model including the  
720 three-way interaction between Y allele, PC1 class, and depth band to the same model but  
721 without the three-way interaction using analysis of variance to determine if the joint interaction  
722 between all variables provides a significant amount of additional power for predicting fish length.

723 Since the size of male fish is likely to influence fitness, we used log-linear models to look at  
724 whether the same factors affecting length could predict the frequency of males. Specifically, we  
725 fit models using `glm()` in R with `family='poisson'` for the frequency of males based on Y allele,  
726 PC1 class, and depth band. We assessed whether the frequency of males belonging to  
727 categories based on these three variables are independent of one another, and if not, what  
728 interactions were involved by performing an analysis of variance on nested pairs of models. We  
729 tested whether the differences in the residual deviance between the models being compared  
730 were significant using  $\chi^2$  tests. This enabled us to find the simplest model that predicts male  
731 frequencies statistically as well as the saturated model that includes all main effects and their  
732 possible interactions. The significance of terms within the context of a particular model for which

733 they were fit was determined using a Wald test of the null hypothesis that a term's effect is equal  
734 to zero.

### 735 *Assessment of linkage disequilibrium around sex loci*

736 We calculated LD in terms of  $r^2$  between each of the most highly sex-associated GWAS SNPs  
737 and their surrounding SNPs using PLINK 1.9 (Purcell, 2014; Purcell *et al.*, 2007). We observed  
738 high LD,  $r^2 > 0.5$ , between the strongest GWAS SNPs tagging chr19-ins and chr7-ins and  
739 far-ranging surrounding SNPs, which we visualized using plot\_zoom  
740 ([https://github.com/hmunby/plot\\_zoom](https://github.com/hmunby/plot_zoom)). In order to determine how unusual these long stretches  
741 of high LD were, we compared the variance in the pairwise physical distance between the top  
742 GWAS SNPs and all SNPs within one megabase and  $r^2 > 0.5$  to an expected distribution. The  
743 background distributions were generated by randomly sampling 5,000 focal SNPs from across  
744 the genome having the same alternate allele frequencies as each of the top GWAS SNPs. For  
745 each sampled SNP, we calculated the variance among pairwise distances with other SNPs in  
746 the same way as we had done for the GWAS SNPs.

### 747 **Acknowledgments**

748 We are grateful to African collaborators who assisted in sample collection, particularly the staff  
749 of the Tanzanian Fisheries Research Institute, as well as Alan Hudson. We thank the  
750 sequencing core staff at the Wellcome Sanger Institute. This work was supported by the  
751 Wellcome Trust (WT207492 and WT206194). Additional support was to MJG & GFT  
752 Leverhulme Trust - Royal Society Africa Awards (AA100023 and AA130107); to MJG  
753 Leverhulme Trust award (RF-2014-686); to GFT Leverhulme Trust award (RPG-2014-214); to  
754 EAM Wellcome Trust Senior Investigator award (104640/Z/14/Z and 219475/Z/19/Z) and CRUK  
755 award (C13474/A27826). GV thanks Wolfson College, University of Cambridge and the  
756 Genetics Society, London for financial support.

### 757 **Competing interests**

758 The authors declare that they have no competing interests.

## 759 References

- 760 Albertson, R. (2002). Genetic basis of adaptive radiation in East African cichlids [Doctoral  
761 Thesis, University of New Hampshire]. <https://scholars.unh.edu/dissertation/98>
- 762 Alexander, D. H., Novembre, J., & Lange, K. (2009). Fast model-based estimation of ancestry in  
763 unrelated individuals. *Genome Research*, *19*(9), 1655–1664.  
764 <https://doi.org/10.1101/gr.094052.109>
- 765 Altschul, S. F., Gish, W., Miller, W., Myers, E. W., & Lipman, D. J. (1990). Basic local alignment  
766 search tool. *Journal of Molecular Biology*, *215*(3), 403–410.  
767 [https://doi.org/10.1016/S0022-2836\(05\)80360-2](https://doi.org/10.1016/S0022-2836(05)80360-2)
- 768 Bachtrog, D., Mank, J. E., Peichel, C. L., Kirkpatrick, M., Otto, S. P., Ashman, T.-L., Hahn, M.  
769 W., Kitano, J., Mayrose, I., Ming, R., Perrin, N., Ross, L., Valenzuela, N., Vamosi, J. C.,  
770 & Tree of Sex Consortium. (2014). Sex determination: Why so many ways of doing it?  
771 *PLoS Biology*, *12*(7), e1001899. <https://doi.org/10.1371/journal.pbio.1001899>
- 772 Baroiller, J. F., Chourrout, D., Fostier, A., & Jalabert, B. (1995). Temperature and sex  
773 chromosomes govern sex ratios of the mouthbrooding Cichlid fish *Oreochromis niloticus*.  
774 *Journal of Experimental Zoology*, *273*(3), 216–223.  
775 <https://doi.org/10.1002/jez.1402730306>
- 776 Bezault, E., Clota, F., Derivaz, M., Chevassus, B., & Baroiller, J.-F. (2007). Sex determination  
777 and temperature-induced sex differentiation in three natural populations of Nile tilapia  
778 (*Oreochromis niloticus*) adapted to extreme temperature conditions. *Aquaculture*, *272*,  
779 S3–S16. <https://doi.org/10.1016/j.aquaculture.2007.07.227>
- 780 Blaser, O., Grossen, C., Neuenschwander, S., & Perrin, N. (2013). Sex-chromosome turnovers  
781 induced by deleterious mutation load. *Evolution*, *67*(3), 635–645.  
782 <https://doi.org/10.1111/j.1558-5646.2012.01810.x>
- 783 Brawand, D., Wagner, C. E., Li, Y. I., Malinsky, M., Keller, I., Fan, S., Simakov, O., Ng, A. Y.,  
784 Lim, Z. W., Bezault, E., Turner-Maier, J., Johnson, J., Alcazar, R., Noh, H. J., Russell, P.,  
785 Aken, B., Alföldi, J., Amemiya, C., Azzouzi, N., ... Di Palma, F. (2014). The genomic  
786 substrate for adaptive radiation in African cichlid fish. *Nature*, *513*(7518), 375–381.  
787 <https://doi.org/10.1038/nature13726>
- 788 Camacho, C., Coulouris, G., Avagyan, V., Ma, N., Papadopoulos, J., Bealer, K., & Madden, T. L.  
789 (2009). BLAST+: Architecture and applications. *BMC Bioinformatics*, *10*(1), 421.  
790 <https://doi.org/10.1186/1471-2105-10-421>
- 791 Carleton, K. L., Conte, M. A., Malinsky, M., Nandamuri, S. P., Sandkam, B. A., Meier, J. I.,



- 792 Mwaiko, S., Seehausen, O., & Kocher, T. D. (2020). Movement of transposable elements  
793 contributes to cichlid diversity. *Molecular Ecology*, 29(24), 4956–4969.  
794 <https://doi.org/10.1111/mec.15685>
- 795 Clark, F. E., Conte, M. A., Ferreira-Bravo, I. A., Poletto, A. B., Martins, C., & Kocher, T. D.  
796 (2017). Dynamic Sequence Evolution of a Sex-Associated B Chromosome in Lake  
797 Malawi Cichlid Fish. *Journal of Heredity*, 108(1), 53–62.  
798 <https://doi.org/10.1093/jhered/esw059>
- 799 Clark, F. E., Conte, M. A., & Kocher, T. D. (2018). Genomic Characterization of a B  
800 Chromosome in Lake Malawi Cichlid Fishes. *Genes*, 9(12).  
801 <https://doi.org/10.3390/genes9120610>
- 802 Clark, F. E., & Kocher, T. D. (2019). Changing sex for selfish gain: B chromosomes of Lake  
803 Malawi cichlid fish. *Scientific Reports*, 9(1), 20213.  
804 <https://doi.org/10.1038/s41598-019-55774-8>
- 805 Conte, M. A., & Kocher, T. D. (2015). An improved genome reference for the African cichlid,  
806 *Metriaclima zebra*. *BMC Genomics*, 16(1), 724.  
807 <https://doi.org/10.1186/s12864-015-1930-5>
- 808 Dechaud, C., Volf, J.-N., Scharl, M., & Naville, M. (2019). Sex and the TEs: Transposable  
809 elements in sexual development and function in animals. *Mobile DNA*, 10(1), 42.  
810 <https://doi.org/10.1186/s13100-019-0185-0>
- 811 Dechaume-Moncharmont, F.-X., Cornuau, J. H., Keddar, I., Ihle, M., Motreuil, S., & Cézilly, F.  
812 (2011). Rapid assessment of female preference for male size predicts subsequent  
813 choice of spawning partner in a socially monogamous cichlid fish. *Comptes Rendus*  
814 *Biologies*, 334(12), 906–910. <https://doi.org/10.1016/j.crv.2011.08.004>
- 815 Dobin, A., & Gingeras, T. R. (2015). Mapping RNA-seq Reads with STAR. *Current Protocols in*  
816 *Bioinformatics*, 51, 11.14.1-11.14.19. <https://doi.org/10.1002/0471250953.bi1114s51>
- 817 Einfeldt, A. L., Kess, T., Messmer, A., Duffy, S., Wringe, B. F., Fisher, J., den Heyer, C.,  
818 Bradbury, I. R., Ruzzante, D. E., & Bentzen, P. (2021). Chromosome level reference of  
819 Atlantic halibut *Hippoglossus hippoglossus* provides insight into the evolution of sexual  
820 determination systems. *Molecular Ecology Resources*, 1755-0998.13369.  
821 <https://doi.org/10.1111/1755-0998.13369>
- 822 Eshel, I. (1975). Selection of sex-ratio and the evolution of sex-determination. *Heredity*, 34(3),  
823 351–361. <https://doi.org/10.1038/hdy.1975.44>
- 824 El Taher, A. E., Ronco, F., Matschiner, M., Salzburger, W., & Böhne, A. (2020). Dynamics of sex  
825 chromosome evolution in a rapid radiation of cichlid fishes [Preprint]. *bioRxiv*.



- 826 <https://doi.org/10.1101/2020.10.23.335596>
- 827 Flynn, J. M., Hubley, R., Goubert, C., Rosen, J., Clark, A. G., Feschotte, C., & Smit, A. F.  
828 (2020). RepeatModeler2 for automated genomic discovery of transposable element  
829 families. *Proceedings of the National Academy of Sciences of the United States of*  
830 *America*, *117*(17), 9451–9457. <https://doi.org/10.1073/pnas.1921046117>
- 831 Fumagalli, M., Vieira, F. G., Linderoth, T., & Nielsen, R. (2014). ngsTools: Methods for  
832 population genetics analyses from next-generation sequencing data. *Bioinformatics*,  
833 *30*(10), 1486–1487. <https://doi.org/10.1093/bioinformatics/btu041>
- 834 Furman, B. L. S., Metzger, D. C. H., Darolti, I., Wright, A. E., Sandkam, B. A., Almeida, P., Shu,  
835 J. J., & Mank, J. E. (2020). Sex Chromosome Evolution: So Many Exceptions to the  
836 Rules. *Genome Biology and Evolution*, *12*(6), 750–763.  
837 <https://doi.org/10.1093/gbe/evaa081>
- 838 Hermann, C. M., Brudermann, V., Zimmermann, H., Vollmann, J., & Sefc, K. M. (2015). Female  
839 preferences for male traits and territory characteristics in the cichlid fish *Tropheus moorii*.  
840 *Hydrobiologia*, *748*(1), 61–74. <https://doi.org/10.1007/s10750-014-1892-7>
- 841 Herpin, A., Braasch, I., Kraeussling, M., Schmidt, C., Thoma, E. C., Nakamura, S., Tanaka, M.,  
842 & Scharl, M. (2010). Transcriptional rewiring of the sex determining *dmrt1* gene  
843 duplicate by transposable elements. *PLoS Genetics*, *6*(2), e1000844.  
844 <https://doi.org/10.1371/journal.pgen.1000844>
- 845 Holzberg, S. (1978). A field and laboratory study of the behaviour and ecology of  
846 *Pseudotropheus zebra* (Boulenger), an endemic cichlid of Lake Malawi (Pisces;  
847 Cichlidae). *Journal of Zoological Systematics and Evolutionary Research*, *16*(3),  
848 171–187. <https://doi.org/10.1111/j.1439-0469.1978.tb00929.x>
- 849 Jiang, D. N., Yang, H. H., Li, M. H., Shi, H. J., Zhang, X. B., & Wang, D. S. (2016). *gsdf* is a  
850 downstream gene of *dmrt1* that functions in the male sex determination pathway of the  
851 Nile tilapia. *Molecular Reproduction and Development*, *83*(6), 497–508.  
852 <https://doi.org/10.1002/mrd.22642>
- 853 Kaneko, H., Ijiri, S., Kobayashi, T., Izumi, H., Kuramochi, Y., Wang, D.-S., Mizuno, S., &  
854 Nagahama, Y. (2015). Gonadal soma-derived factor (*gsdf*), a TGF-beta superfamily  
855 gene, induces testis differentiation in the teleost fish *Oreochromis niloticus*. *Molecular*  
856 *and Cellular Endocrinology*, *415*, 87–99. <https://doi.org/10.1016/j.mce.2015.08.008>
- 857 Kocher, T. D. (2004). Adaptive evolution and explosive speciation: The cichlid fish model. *Nature*  
858 *Reviews. Genetics*, *5*(4), 288–298. <https://doi.org/10.1038/nrg1316>
- 859 Korneliussen, T. S., Albrechtsen, A., & Nielsen, R. (2014). ANGSD: Analysis of Next Generation

- 860 Sequencing Data. *BMC Bioinformatics*, *15*, 356.  
861 <https://doi.org/10.1186/s12859-014-0356-4>
- 862 Kozlov, A. M., Darriba, D., Flouri, T., Morel, B., & Stamatakis, A. (2019). RAXML-NG: A fast,  
863 scalable and user-friendly tool for maximum likelihood phylogenetic inference.  
864 *Bioinformatics*, *35*(21), 4453–4455. <https://doi.org/10.1093/bioinformatics/btz305>
- 865 Lande, R., Seehausen, O., & Alphen, J. J. M. van. (2001). Mechanisms of rapid sympatric  
866 speciation by sex reversal and sexual selection in cichlid fish. *Genetica*, *112/113*,  
867 435–443. <https://doi.org/10.1023/A:1013379521338>
- 868 Lefort, V., Desper, R., & Gascuel, O. (2015). FastME 2.0: A Comprehensive, Accurate, and Fast  
869 Distance-Based Phylogeny Inference Program. *Molecular Biology and Evolution*, *32*(10),  
870 2798–2800. <https://doi.org/10.1093/molbev/msv150>
- 871 Li, D., Luo, R., Liu, C.-M., Leung, C.-M., Ting, H.-F., Sadakane, K., Yamashita, H., & Lam, T.-W.  
872 (2016). MEGAHIT v1.0: A fast and scalable metagenome assembler driven by advanced  
873 methodologies and community practices. *Methods*, *102*, 3–11.  
874 <https://doi.org/10.1016/j.ymeth.2016.02.020>
- 875 Li, H., Handsaker, B., Wysoker, A., Fennell, T., Ruan, J., Homer, N., Marth, G., Abecasis, G.,  
876 Durbin, R., & 1000 Genome Project Data Processing Subgroup. (2009). The Sequence  
877 Alignment/Map format and SAMtools. *Bioinformatics*, *25*(16), 2078–2079.  
878 <https://doi.org/10.1093/bioinformatics/btp352>
- 879 Li, Heng. (2013). Aligning sequence reads, clone sequences and assembly contigs with  
880 BWA-MEM. *ArXiv:1303.3997 [q-Bio]*. <http://arxiv.org/abs/1303.3997>
- 881 Liao, Y., Smyth, G. K., & Shi, W. (2014). featureCounts: An efficient general purpose program  
882 for assigning sequence reads to genomic features. *Bioinformatics*, *30*(7), 923–930.  
883 <https://doi.org/10.1093/bioinformatics/btt656>
- 884 Malinsky, M., Challis, R. J., Tyers, A. M., Schiffels, S., Terai, Y., Ngatunga, B. P., Miska, E. A.,  
885 Durbin, R., Genner, M. J., & Turner, G. F. (2015). Genomic islands of speciation separate  
886 cichlid ecomorphs in an East African crater lake. *Science*, *350*(6267), 1493–1498.  
887 <https://doi.org/10.1126/science.aac9927>
- 888 Malinsky, Milan, Svardal, H., Tyers, A. M., Miska, E. A., Genner, M. J., Turner, G. F., & Durbin,  
889 R. (2018). Whole-genome sequences of Malawi cichlids reveal multiple radiations  
890 interconnected by gene flow. *Nature Ecology & Evolution*, *2*(12), 1940–1955.  
891 <https://doi.org/10.1038/s41559-018-0717-x>
- 892 Markert, J. A., & Arnegard, M. E. (2007). Size-dependent use of territorial space by a  
893 rock-dwelling cichlid fish. *Oecologia*, *154*(3), 611–621.

- 894 <https://doi.org/10.1007/s00442-007-0853-5>
- 895 Matsuda, M., & Sakaizumi, M. (2016). Evolution of the sex-determining gene in the teleostean  
896 genus *Oryzias*. *General and Comparative Endocrinology*, 239, 80–88.  
897 <https://doi.org/10.1016/j.ygcen.2015.10.004>
- 898 McKenna, A., Hanna, M., Banks, E., Sivachenko, A., Cibulskis, K., Kernytsky, A., Garimella, K.,  
899 Altshuler, D., Gabriel, S., Daly, M., & DePristo, M. A. (2010). The Genome Analysis  
900 Toolkit: A MapReduce framework for analyzing next-generation DNA sequencing data.  
901 *Genome Research*, 20(9), 1297–1303. <https://doi.org/10.1101/gr.107524.110>
- 902 Myosho, T., Otake, H., Masuyama, H., Matsuda, M., Kuroki, Y., Fujiyama, A., Naruse, K.,  
903 Hamaguchi, S., & Sakaizumi, M. (2012). Tracing the Emergence of a Novel  
904 Sex-Determining Gene in Medaka, *Oryzias luzonensis*. *Genetics*, 191(1), 163–170.  
905 <https://doi.org/10.1534/genetics.111.137497>
- 906 Nelson, C.M. (1995). Male size, spawning pit size and female mate choice in a lekking cichlid  
907 fish. *Animal Behaviour*, 50(6), 1587–1599.  
908 [https://doi.org/10.1016/0003-3472\(95\)80013-1](https://doi.org/10.1016/0003-3472(95)80013-1)
- 909 Parnell, N. F., & Streelman, J. T. (2013). Genetic interactions controlling sex and color establish  
910 the potential for sexual conflict in Lake Malawi cichlid fishes. *Heredity*, 110(3), 239–246.  
911 <https://doi.org/10.1038/hdy.2012.73>
- 912 Pennell, M. W., Mank, J. E., & Peichel, C. L. (2018). Transitions in sex determination and sex  
913 chromosomes across vertebrate species. *Molecular Ecology*, 27(19), 3950–3963.  
914 <https://doi.org/10.1111/mec.14540>
- 915 Peterson, E. N., Cline, M. E., Moore, E. C., Roberts, N. B., & Roberts, R. B. (2017). Genetic sex  
916 determination in *Astatotilapia calliptera*, a prototype species for the Lake Malawi cichlid  
917 radiation. *Die Naturwissenschaften*, 104(5–6), 41.  
918 <https://doi.org/10.1007/s00114-017-1462-8>
- 919 Poplin, R., Ruano-Rubio, V., DePristo, M. A., Fennell, T. J., Carneiro, M. O., Van der Auwera, G.  
920 A., Kling, D. E., Gauthier, L. D., Levy-Moonshine, A., Roazen, D., Shakir, K., Thibault, J.,  
921 Chandran, S., Whelan, C., Lek, M., Gabriel, S., Daly, M. J., Neale, B., MacArthur, D. G.,  
922 & Banks, E. (2017). Scaling accurate genetic variant discovery to tens of thousands of  
923 samples [Preprint]. *bioRxiv*. <https://doi.org/10.1101/201178>
- 924 Purcell, S. (2014). *PLINK 1.9*. <http://pngu.mgh.harvard.edu/purcell/plink/>
- 925 Purcell, S., Neale, B., Todd-Brown, K., Thomas, L., Ferreira, M. A. R., Bender, D., Maller, J.,  
926 Sklar, P., de Bakker, P. I. W., Daly, M. J., & Sham, P. C. (2007). PLINK: A tool set for  
927 whole-genome association and population-based linkage analyses. *American Journal of*

- 928 *Human Genetics*, 81(3), 559–575. <https://doi.org/10.1086/519795>
- 929 R Core Team. (2020). R: A Language and Environment for Statistical Computing. R Foundation  
930 for Statistical Computing. <https://www.R-project.org/>
- 931 Rhie, A., McCarthy, S. A., Fedrigo, O., Damas, J., Formenti, G., Koren, S., Uliano-Silva, M.,  
932 Chow, W., Fungtammasan, A., Kim, J., Lee, C., Ko, B. J., Chaisson, M., Gedman, G. L.,  
933 Cantin, L. J., Thibaud-Nissen, F., Haggerty, L., Bista, I., Smith, M., ... Jarvis, E. D.  
934 (2021). Towards complete and error-free genome assemblies of all vertebrate species.  
935 *Nature*, 592(7856), 737–746. <https://doi.org/10.1038/s41586-021-03451-0>
- 936 Roberts, R. B., Ser, J. R., & Kocher, T. D. (2009). Sexual Conflict Resolved by Invasion of a  
937 Novel Sex Determiner in Lake Malawi Cichlid Fishes. *Science*, 326(5955), 998–1001.  
938 <https://doi.org/10.1126/science.1174705>
- 939 Robinson, J. T., Thorvaldsdóttir, H., Winckler, W., Guttman, M., Lander, E. S., Getz, G., &  
940 Mesirov, J. P. (2011). Integrative genomics viewer. *Nature Biotechnology*, 29(1), 24–26.  
941 <https://doi.org/10.1038/nbt.1754>
- 942 Robinson, M. D., McCarthy, D. J., & Smyth, G. K. (2010). edgeR: A Bioconductor package for  
943 differential expression analysis of digital gene expression data. *Bioinformatics*, 26(1),  
944 139–140. <https://doi.org/10.1093/bioinformatics/btp616>
- 945 Ronco, F., Büscher, H. H., Indermaur, A., & Salzburger, W. (2020). The taxonomic diversity of  
946 the cichlid fish fauna of ancient Lake Tanganyika, East Africa. *Journal of Great Lakes  
947 Research*, 46(5), 1067–1078. <https://doi.org/10.1016/j.jglr.2019.05.009>
- 948 Saunders, P. A., Neuenschwander, S., & Perrin, N. (2018). Sex chromosome turnovers and  
949 genetic drift: A simulation study. *Journal of Evolutionary Biology*, 31(9), 1413–1419.  
950 <https://doi.org/10.1111/jeb.13336>
- 951 Schartl, M., Schories, S., Wakamatsu, Y., Nagao, Y., Hashimoto, H., Bertin, C., Mourot, B.,  
952 Schmidt, C., Wilhelm, D., Centanin, L., Guiguen, Y., & Herpin, A. (2018). Sox5 is  
953 involved in germ-cell regulation and sex determination in medaka following co-option of  
954 nested transposable elements. *BMC Biology*, 16(1), 16.  
955 <https://doi.org/10.1186/s12915-018-0485-8>
- 956 Sefc, K. M. (2011). Mating and Parental Care in Lake Tanganyika's Cichlids. *International  
957 Journal of Evolutionary Biology*, 2011, 1–20. <https://doi.org/10.4061/2011/470875>
- 958 Ser, J. R., Roberts, R. B., & Kocher, T. D. (2010). Multiple interacting loci control sex  
959 determination in Lake Malawi cichlid fish. *Evolution*, 64(2), 486–501.  
960 <https://doi.org/10.1111/j.1558-5646.2009.00871.x>
- 961 Theis, A., Bosia, T., Roth, T., Salzburger, W., & Egger, B. (2015). Egg-spot pattern and body

- 962 size asymmetries influence male aggression in haplochromine cichlid fishes. *Behavioral*  
963 *Ecology*, 26(6), 1512–1519. <https://doi.org/10.1093/beheco/arv104>
- 964 Turner, G. F., & Huntingford, F. A. (1986). A problem for game theory analysis: Assessment and  
965 intention in male mouthbrooder contests. *Animal Behaviour*, 34(4), 961–970.  
966 [https://doi.org/10.1016/S0003-3472\(86\)80155-5](https://doi.org/10.1016/S0003-3472(86)80155-5)
- 967 Turner, G., Ngatunga, B. P., & Genner, M. J. (2019). The Natural History of the Satellite Lakes of  
968 Lake Malawi [Preprint]. *EcoEvoRxiv*. <https://doi.org/10.32942/osf.io/sehdq>
- 969 Van der Auwera, G., & O'Connor, B. (2020). *Genomics in the Cloud: Using Docker, GATK, and*  
970 *WDL in Terra* (1st ed.). O'Reilly Media.
- 971 van Doorn, G. S., & Kirkpatrick, M. (2007). Turnover of sex chromosomes induced by sexual  
972 conflict. *Nature*, 449(7164), 909–912. <https://doi.org/10.1038/nature06178>
- 973 van Doorn, G. S., & Kirkpatrick, M. (2010). Transitions between male and female heterogamety  
974 caused by sex-antagonistic selection. *Genetics*, 186(2), 629–645.  
975 <https://doi.org/10.1534/genetics.110.118596>
- 976 Vicoso, B. (2019). Molecular and evolutionary dynamics of animal sex-chromosome turnover.  
977 *Nature Ecology & Evolution*, 3(12), 1632–1641.  
978 <https://doi.org/10.1038/s41559-019-1050-8>
- 979 Vieira, F. G., Lassalle, F., Korneliussen, T. S., & Fumagalli, M. (2016). Improving the estimation  
980 of genetic distances from Next-Generation Sequencing data: Genetic Distances from  
981 NGS Data. *Biological Journal of the Linnean Society*, 117(1), 139–149.  
982 <https://doi.org/10.1111/bij.12511>
- 983 Werren, J. H., & Beukeboom, L. W. (1998). Sex determination, sex ratios, and genetic conflict.  
984 *Annual Review of Ecology and Systematics*, 29(1), 233–261.  
985 <https://doi.org/10.1146/annurev.ecolsys.29.1.233>
- 986 Williamson, D., Jackson, M. J., Banerjee, S. K., Marvin, J., Merdaci, O., Thouveny, N.,  
987 Decobert, M., Gibert-Massault, E., Massault, M., Mazaudier, D., & Taieb, M. (1999).  
988 Magnetic signatures of hydrological change in a tropical maar-lake (Lake Massoko,  
989 Tanzania): Preliminary results. *Physics and Chemistry of the Earth, Part A: Solid Earth*  
990 *and Geodesy*, 24(9), 799–803. [https://doi.org/10.1016/S1464-1895\(99\)00117-9](https://doi.org/10.1016/S1464-1895(99)00117-9)
- 991 Zhou, X., & Stephens, M. (2012). Genome-wide efficient mixed-model analysis for association  
992 studies. *Nature Genetics*, 44(7), 821–824. <https://doi.org/10.1038/ng.2310>
- 993 Zhu, Y., Meng, L., Xu, W., Cui, Z., Zhang, N., Guo, H., Wang, N., Shao, C., & Chen, S. (2018).  
994 The autosomal Gsdg gene plays a role in male gonad development in Chinese tongue  
995 sole (*Cynoglossus semilaevis*). *Scientific Reports*, 8(1), 17716.

996 <https://doi.org/10.1038/s41598-018-35553-7>

997 **Supplementary Figures & Tables**



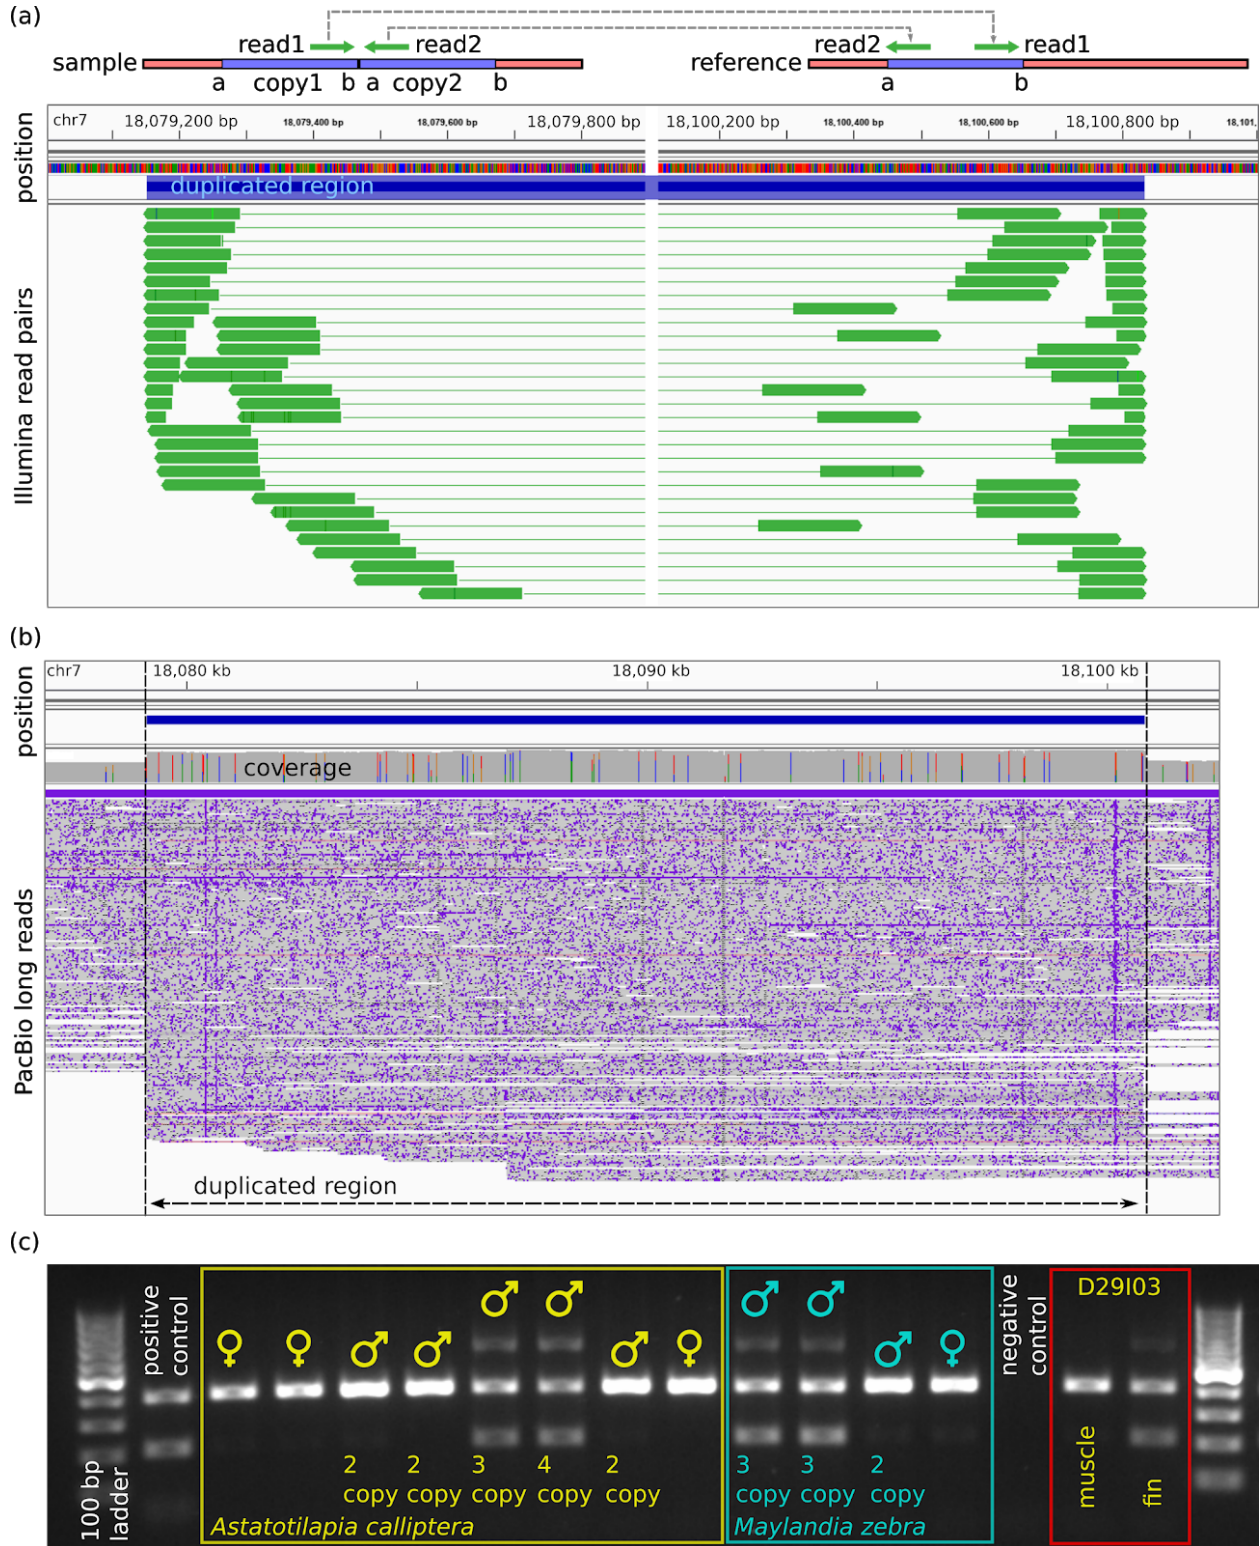

998 **Figure S1: Characterization of the *gsdf* duplication.** (a) Short Illumina reads from four  
999 Masoko male *A. calliptera* called homozygous for the *gsdf* duplication based on relative



1000 sequencing depth that is approximately 2x higher than in ~38 kb of non-duplicated flanking  
1001 sequence. The mapping orientation of all read pairs to the fAstCal1.2 reference is consistent  
1002 with a tandem duplication as shown in the schematic at the top. **(b)** PacBio reads from a male  
1003 *Tropheops 'mauve'* mapped to the fAstCal1.2 reference. The sharp break in the alignment of  
1004 some of the reads at the edges of the *gsdf* duplication (blue horizontal bar) in conjunction with  
1005 elevated coverage signals that this individual is heterozygous for the same *gsdf* duplication  
1006 identified in Masoko *A. calliptera*. **(c)** Agarose gel image of PCR products from primers  
1007 designed to assay for the presence of the *gsdf* duplication. Based on this assay, individuals  
1008 positive for the *gsdf* duplication yield three distinct bands, whereas those negative for the  
1009 duplication produce a single band. The assay was used to confirm the presence of the  
1010 duplication in two male *Maylandia zebra* samples that were putative heterozygotes for *gsdf*-dup  
1011 based on sequencing depth. Two separate tissues for Masoko *A. calliptera* sample D29I03  
1012 produced different genotypes based on this PCR assay indicating a sampling error and resulted  
1013 in this individual being omitted from all analyses.

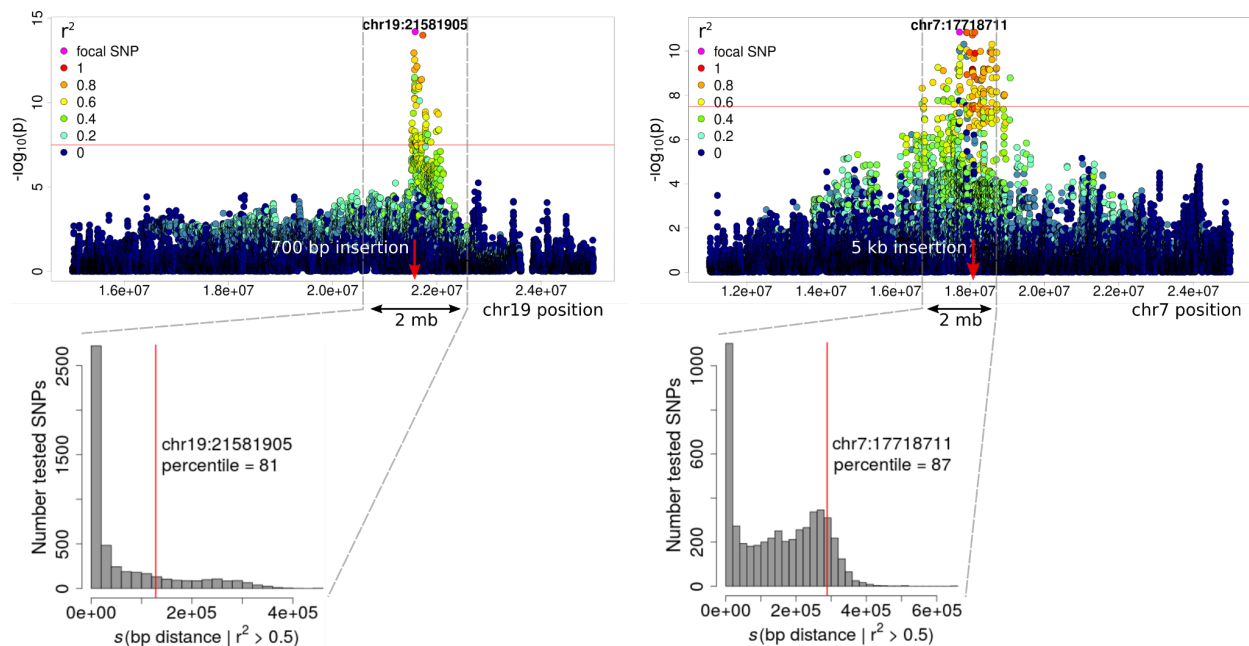

1014 **Figure S2: Elevated linkage disequilibrium around the chr19-ins and chr7-ins loci.** The top  
1015 Manhattan plots are a regional view of the p-values for the likelihood ratio test from the GWAS  
1016 for sex used to identify SNPs tagging chr19-ins (left) and chr7-ins (right). The positions of the  
1017 insertions are denoted with red arrows. Elevated linkage disequilibrium (LD) between the SNP  
1018 with the highest sex association in each GWAS and other surrounding SNPs extends far along

1019 the respective chromosomes. This causes the variance in the pairwise physical distance among  
1020 SNPs in high LD ( $r^2 > 0.5$ ) with the top GWAS SNPs to be higher than typically expected  
1021 throughout the genome, consistent with recent positive selection. The histograms show where  
1022 this variance for the top GWAS SNPs fall along the expected distributions for Masoko *A.*  
1023 *calliptera*, which were generated by randomly sampling 5,000 SNPs across the genome with the  
1024 same alternate allele frequencies as the GWAS SNPs. The variance among the pairwise  
1025 distances between each sampled SNP and their surrounding high-LD SNPs were calculated in  
1026 the same manner as for the GWAS SNPs.

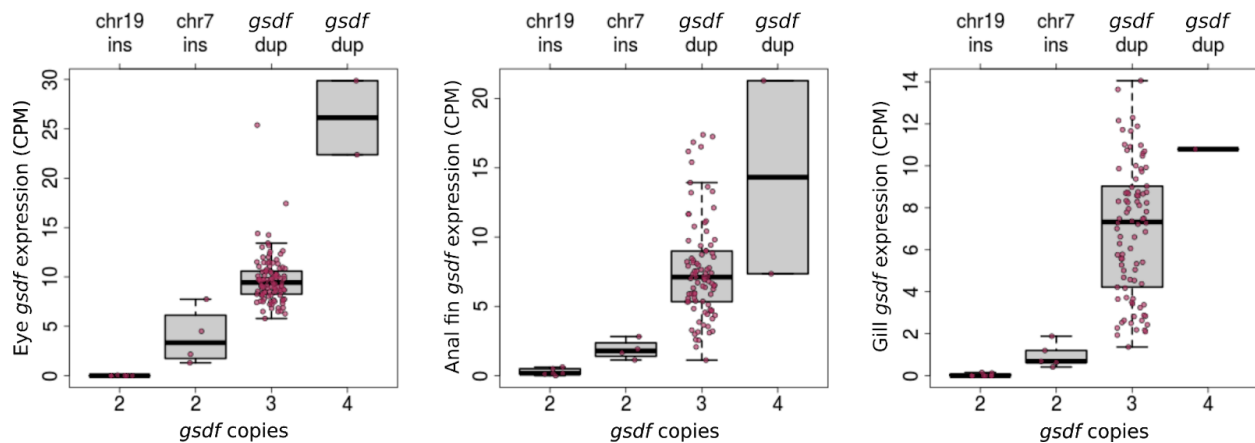

1027 **Figure S3: Expression of *gsdF* in somatic tissues for males with different Y alleles.** The  
1028 *gsdF*-dup and chr7-ins alleles are defined by a tandem duplication of the *gsdF* gene and an  
1029 insertion directly upstream of *gsdF*, respectively. Levels of *gsdF* expression in eye, anal fin, and  
1030 gill tissues from Masoko male *A. calliptera* demonstrate that males carrying putative Y alleles  
1031 generated through mutations involving *gsdF* express this gene more than other males.

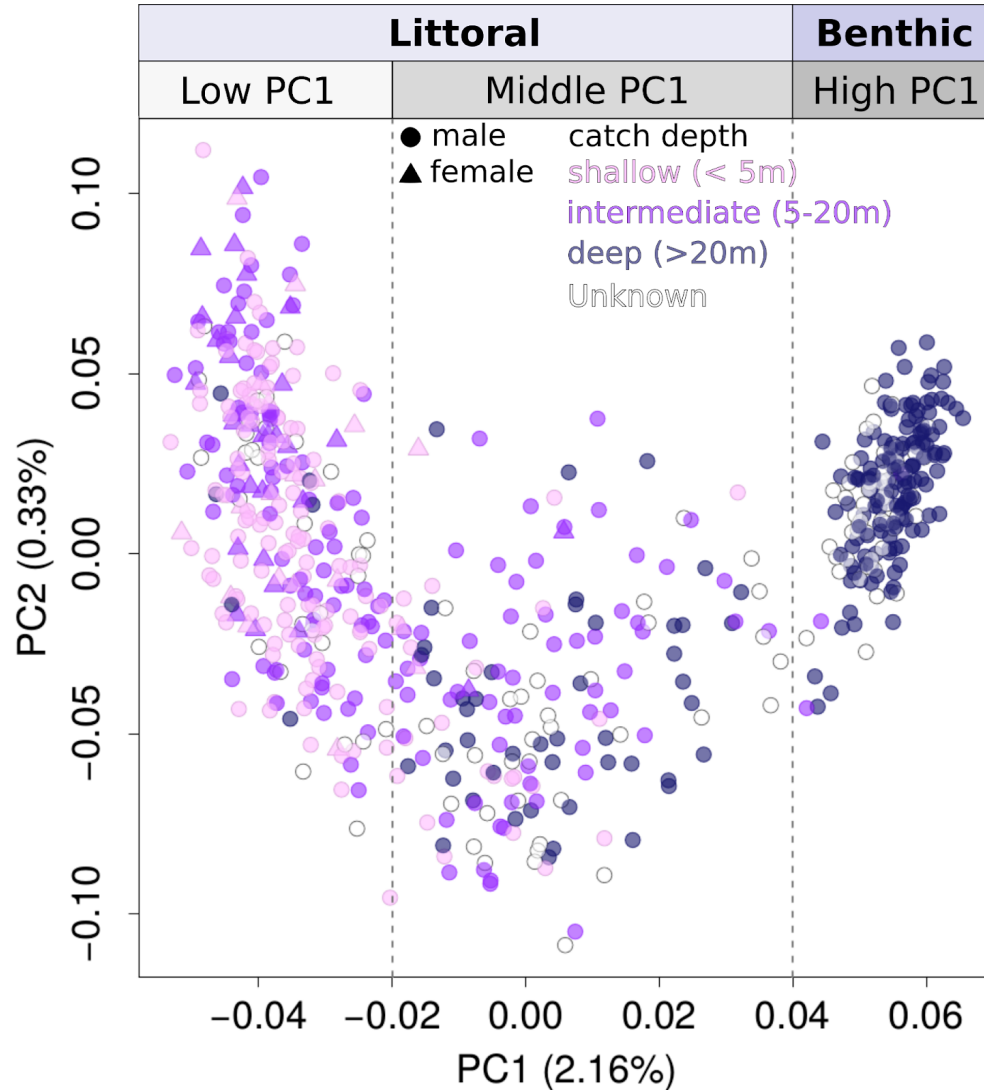

1032 **Figure S4: Relationship between genetic variation and catch depth.** Lake Masoko A.  
1033 *calliptera* distributed along the first two components of a principal component analysis of  
1034 genome-wide variation reveals strong philopatry of high PC1 fish for deep depths. This  
1035 coincides with nearly all high PC1 individuals conforming to the benthic ecomorph. In contrast,  
1036 fish below PC1 values of 0.04 are almost all of the littoral ecomorph and exhibit far less  
1037 constrained habitat preference. Among littoral fish (PC1 < 0.04), the most admixed individuals in  
1038 the middle of PC1 (-0.02 to 0.04) regularly occupy all depth bands, while low PC1 littorals (PC1  
1039 < -0.02) remain mostly at depths above 20 metres, though occasionally they are found deep.

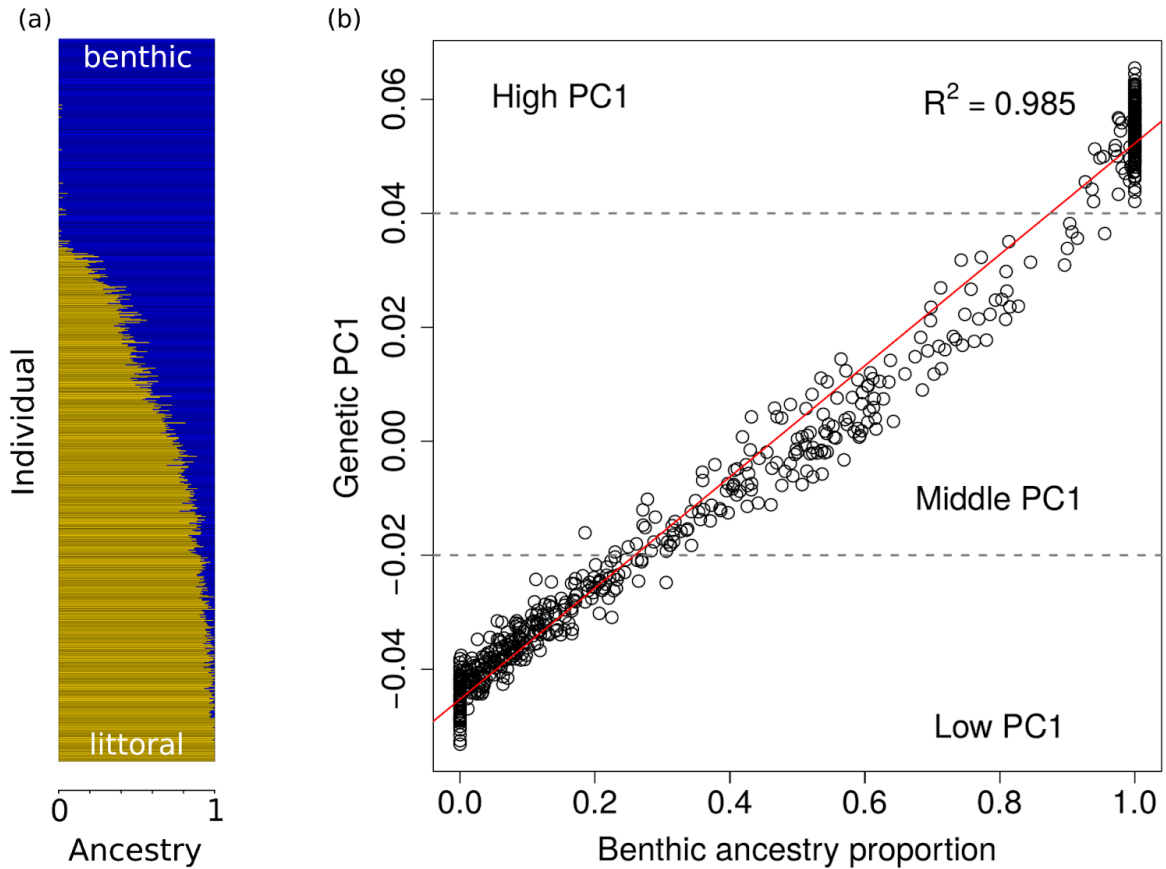

1040 **Figure S5: Ancestry characterization of Masoko *A. calliptera*.** (a) Genome-wide ancestry  
1041 proportions for individuals inferred using the program ADMIXTURE and ordered by their genetic  
1042 PC1 rank shows the genetic distinctiveness of the benthic (high PC1) subgroup, a subset of  
1043 littorals having low amounts of benthic ancestry (low PC1), and a highly admixed group (middle  
1044 PC1). (b) The genetic PC1 scores of Lake Masoko individuals regressed against their  
1045 proportion of benthic ancestry shows that PC1 almost perfectly describes the genetic structure  
1046 of the Lake Masoko population in terms of the continuum between genetically benthic and  
1047 littoral ancestries. The fitted linear regression line is shown in red and the low, middle, and high  
1048 PC1 classification cutoffs are depicted with dashed grey lines.

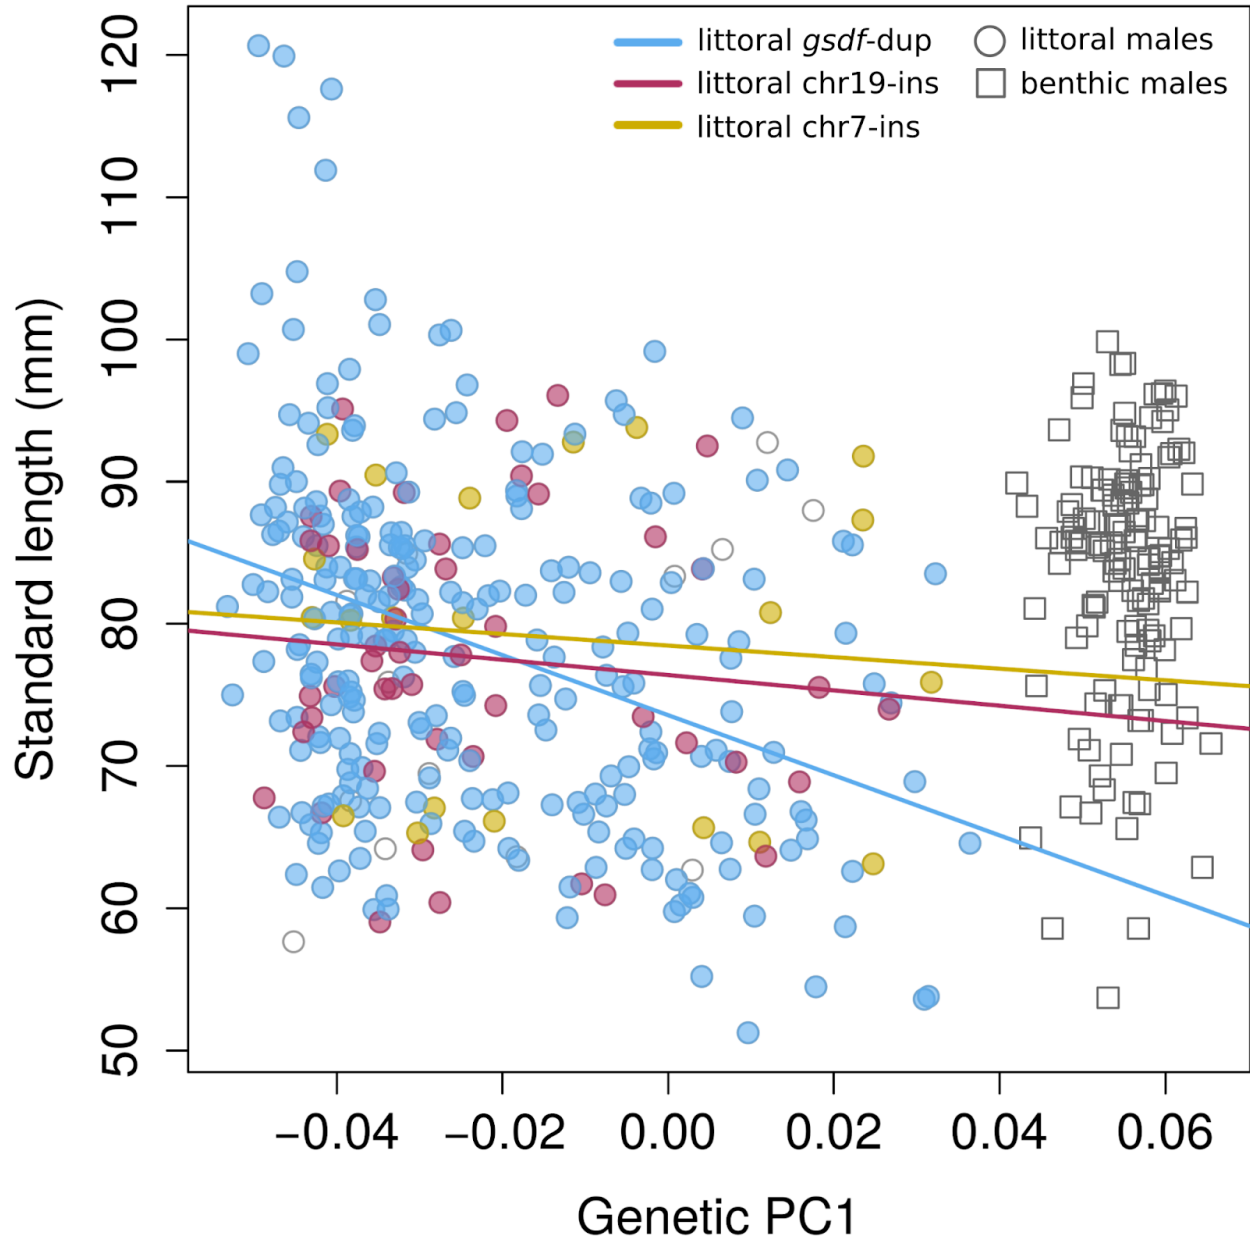

1049 **Figure S6: Interaction between genetic background and Y allele in predicting male size.**

1050 The standard lengths of male *A. calliptera* from Lake Masoko plotted against their position along  
1051 PC1 of the principal component analysis of genome-wide variation shows a negative trend in  
1052 the length among genetically littoral (PC1 < 0.04) males (circles) with increasing PC1 value.  
1053 Linear regression models of length predicted by PC1 were fitted separately for littoral males  
1054 heterozygous for either *gsdf*-dup, chr19-ins, or chr7-ins corresponding to the colours blue, red,  
1055 and yellow, respectively. Littoral males carrying more than one Y allele, homozygous for Y  
1056 alleles, or which did not have an identified Y, are represented by uncoloured circles and were

1057 excluded from the regressions. Genetically benthic males, defined as fish with  $PC1 > 0.04$ , are  
1058 plotted for comparative purposes as squares without any indication of their Y genotype. The  
1059 distinctly more negative slope of the regression line fit to *gsdf*-dup males compared to chr19-ins  
1060 and chr7-ins males shows that length is predicted to decrease much more drastically with more  
1061 benthic admixture among *gsdf*-dup males. This difference is so great that males using *gsdf*-dup  
1062 are predicted to switch from being longer than males using other Y alleles to actually being  
1063 shorter above PC1 values of -0.02.



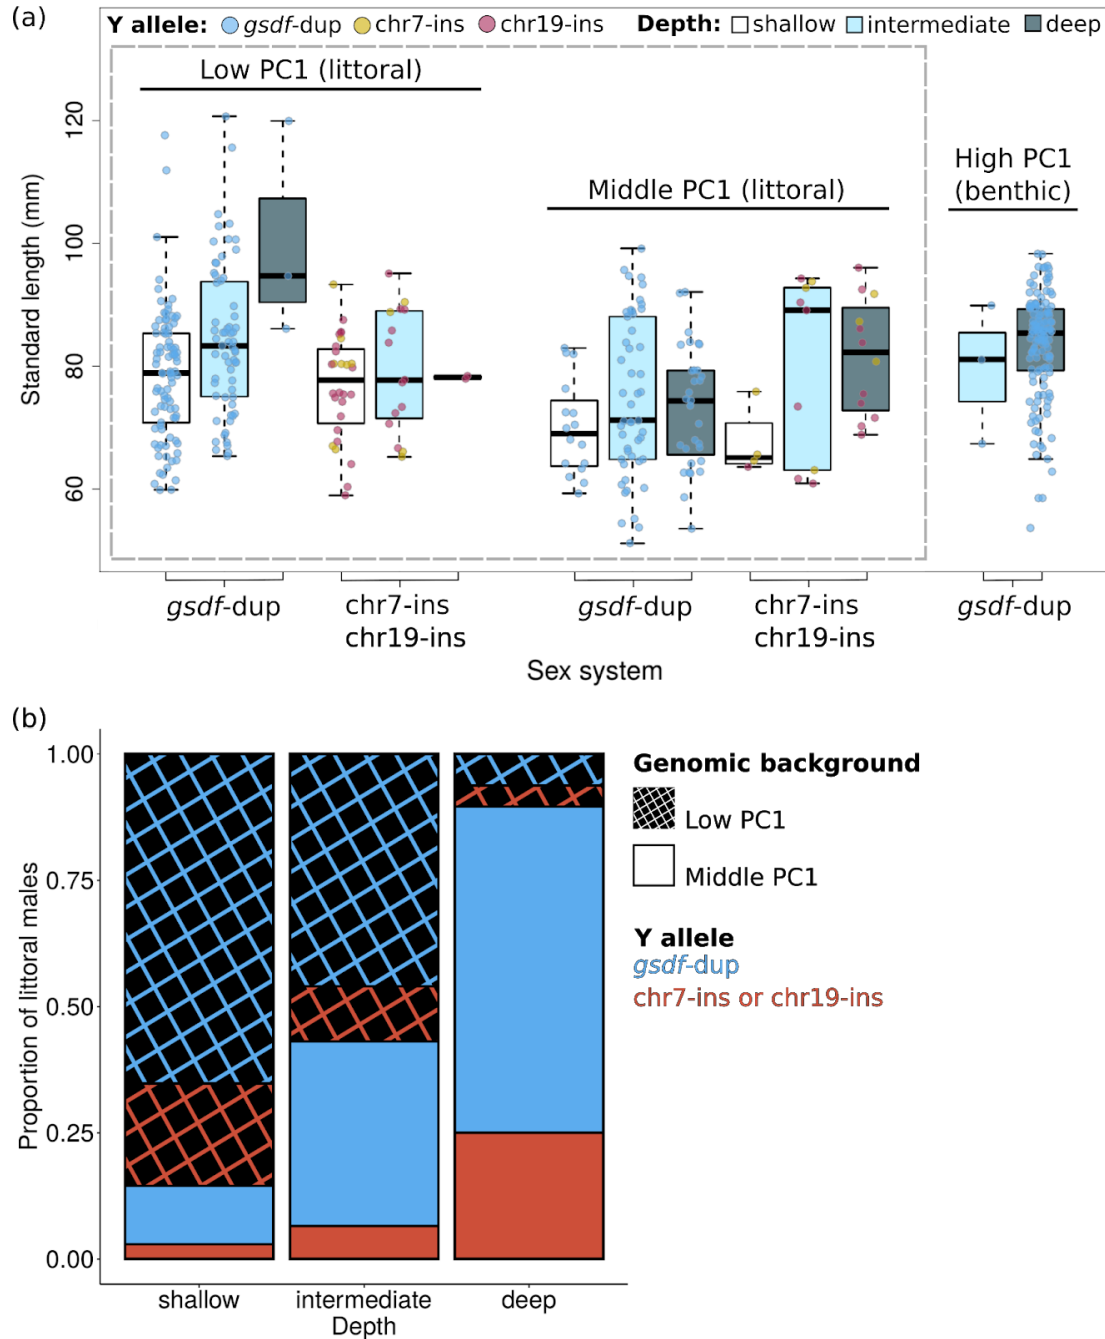

1064 **Figure S7: Male sizes and frequencies according to Y allele, genetic PC1, and catch**  
 1065 **depth.** (a) Standard length comparisons across different PC1 genetic backgrounds and catch  
 1066 depths of Lake Masoko *A. calliptera* males heterozygous for only one of the Y alleles shows an  
 1067 interaction between Y allele, catch depth, and PC1 background in predicting size. Among the  
 1068 genetically littoral males (within the dashed grey box) those carrying *g sdf-dup* are smaller on  
 1069 middle PC1 versus low PC1 backgrounds regardless of what depth they are found at. In

1070 contrast, among males using the other Y alleles only middle PC1 males found in shallow waters  
1071 are smaller than the low PC1 males, while at deeper depths their size remains constant across  
1072 genetic backgrounds and may even show a subtle tendency to be larger with middle PC1  
1073 benthic ancestry. **(b)** A comparison of the proportion of littoral males characterized by different  
1074 genetic PC1 backgrounds and Y alleles at different catch depths shows that the proportion of  
1075 males with middle PC1 ancestry increases with depth. However, within PC1 backgrounds, the  
1076 fraction of males using the different Y alleles remains relatively stable across depths. Overall,  
1077 *gsdf*-dup males dominate at all depths.

1078 **Tables S1 to S7** can be found in the attached Excel file:  
1079 `supplementary_tables_differential_use_of_multiple_genetic_sex_determination_systems_in_div`  
1080 `ergent_ecomorphs_of_an_African_crater_lake_cichlid.xls`. For convenience the table legends  
1081 are given below, and we also copy below the contents of tables S3 and S7, which are short.

1082 **Table S1: Lake Masoko *Astatotilapia calliptera* samples** Genetic, phenotypic, and collection  
1083 information for all Lake Masoko *A. calliptera* samples.

1084 **Table S2: GWAS multilocus sex determination genotype frequencies** Counts of Masoko *A.*  
1085 *calliptera* individuals, stratified by sex and PC1 genetic background, for all observed  
1086 combinations of *gsdf* copy number and genotypes at the most strongly associated SNPs in the  
1087 serial GWAS for sex. 0 = reference allele, 1 = insertion allele, ./ = missing genotype.

1088 **Table S3: Average sizes of Masoko males** The mean standard length of Masoko *A. calliptera*  
1089 males heterozygous for one type of Y allele stratified by PC1 genetic background and catch  
1090 depth.

| Lake-wide mean length (mm) |         |            |
|----------------------------|---------|------------|
| Y allele                   | Low PC1 | Middle PC1 |
| <i>gsdf</i> -dup           | 81.34   | 73.55      |
| chr7-ins or chr19-ins      | 77.68   | 78.73      |
|                            |         |            |

| Shallow (< 5 m) mean length (mm)       |         |            |
|----------------------------------------|---------|------------|
| Y allele                               | Low PC1 | Middle PC1 |
| <i>gsdf</i> -dup                       | 78.55   | 69.91      |
| chr7-ins or chr19-ins                  | 76.67   | 67.46      |
|                                        |         |            |
| Intermediate (5-20 m) mean length (mm) |         |            |
| Y allele                               | Low PC1 | Middle PC1 |
| <i>gsdf</i> -dup                       | 84.41   | 74.87      |
| chr7-ins or chr19-ins                  | 79.50   | 79.96      |
|                                        |         |            |
| Deep (> 20 m) mean length (mm)         |         |            |
| Y allele                               | Low PC1 | Middle PC1 |
| <i>gsdf</i> -dup                       | 100.26  | 73.33      |
| chr7-ins or chr19-ins                  | 78.22   | 81.56      |

1091 **Table S4: Littoral male frequencies according to genetic type and catch depth** Counts of  
 1092 Lake Masoko *A. calliptera* littoral males heterozygous for one type of Y allele stratified by  
 1093 genetic PC1 background and depth at which they were caught.

1094 **Table S5: Sex loci genotype calls for Lake Malawi cichlid radiation species** The number of  
 1095 *gsdf* copies and genotype (GT) calls for chr19-ins and chr7-ins (0 = reference allele, 1 =  
 1096 insertion allele, ./ = missing genotype) for individuals of different species belonging to the Lake  
 1097 Malawi haplochromine cichlid radiation. The AC values indicate the number of “<reference  
 1098 allele>,<insertion allele>” sequencing reads observed for an individual.

1099 **Table S6: Frequency of chr7-ins in non-calliptera species from the Lake Malawi**

1100 **haplochromine radiation** Counts of individuals from all species apart from *Astatotilapia*

1101 *calliptera* in which chr7-ins was found, stratified by *gsdf* copy number and chr7-ins genotype.

1102 Multilocus genotype calls are defined as <number of *gsdf* copies>/<number of chr7-ins alleles>:

1103 for example, “3/1” denotes an individual possessing three *gsdf* copies and who is heterozygous

1104 for the insertion allele at the chr7-ins locus. Genotype class cells with non-zero counts are

1105 highlighted for readability.

1106 **Table S7: PCR primers for the detection of *gsdf*-dup** All samples should undergo

1107 amplification for the 402 bp control fragment, whereas only samples positive for the *gsdf*

1108 duplication should show equally strong amplification for the 207 bp fragment (and an additional

1109 614 bp fragment which is not present when each primer pair is run in individual reactions).

| primer      | sequence             | Tm (°C) | %GC | primer partner | amplicon size (bp) |
|-------------|----------------------|---------|-----|----------------|--------------------|
| dup_fwd     | TGTCGCGTCATAACGAGGAG | 59.9    | 55  | dup_rev        | 207                |
| dup_rev     | AGCTGATCTGGTCCCTCACT | 60.0    | 55  | dup_fwd        |                    |
| control_fwd | GCTGCCACCTCGTAGTAAT  | 59.5    | 55  | control_rev    | 402                |
| control_rev | GCACGAGTGGGAACCAGTAA | 60.0    | 55  | control_fwd    |                    |
| dup_fwd     |                      |         |     | control_rev    | 614                |
